# Supplementary material for: Shaping Durum Wheat for the Future: Gene Expression Analyses and Metabolites Profiling Support the Contribution of BCAT Genes to Drought Stress Response
Source: Front Plant Sci. 2020 Jul 3;11:891. doi: 10.3389/fpls.2020.00891 (PMC7350509; doi:10.3389/fpls.2020.00891)
Supplement: Supplementary file 2 [file Data_Sheet_2.xlsx]

## Sheet: Supp_M3_per_Paper
Sequence ID	TFBS ID	Position	Strand	Binding sequence	TF family	TF ID (Oryza)
TdBCAT-A	TF_motif_seq_0259	-994	-	GGTCG	(Motif sequence only)					-
TdBCAT-A	TF_motif_seq_0324	-993	-	GTCGGa	(Motif sequence only)
TdBCAT-B	TF_motif_seq_0372	-987	-	caCGAAC	(Motif sequence only)
TdBCAT-A	TF_motif_seq_0274	-976	+	TGTCT	(Motif sequence only)
TdBCAT-B	TF_motif_seq_0363	-975	+	CCAATgc	(Motif sequence only)
TdBCAT-A	TF_motif_seq_0274	-972	+	TGTCT	(Motif sequence only)
TdBCAT-B	TF_motif_seq_0274	-971	+	TGCCA	(Motif sequence only)
TdBCAT-B	TF_motif_seq_0274	-971	-	TGCCA	(Motif sequence only)
TdBCAT-A	TF_motif_seq_0259	-946	-	GGTCG	(Motif sequence only)
TdBCAT-A	TF_motif_seq_0324	-945	-	GTCGGg	(Motif sequence only)
TdBCAT-A	TF_motif_seq_0274	-936	+	TGTCT	(Motif sequence only)
TdBCAT-A	TF_motif_seq_0259	-933	-	CTTCG	(Motif sequence only)
TdBCAT-B	TF_motif_seq_0334	-931	+	TGGGCt	(Motif sequence only)
TdBCAT-B	TF_motif_seq_0274	-926	-	TGACC	(Motif sequence only)
TdBCAT-B	TF_motif_seq_0425	-921	-	cggCCTGG	(Motif sequence only)
TdBCAT-B	TF_motif_seq_0274	-908	+	TGTCC	(Motif sequence only)
TdBCAT-A	TF_motif_seq_0259	-907	-	CTTCG	(Motif sequence only)
TdBCAT-A	TF_motif_seq_0274	-903	+	GGTCA	(Motif sequence only)
TdBCAT-B	TF_motif_seq_0309	-903	+	CCTTTt	(Motif sequence only)
TdBCAT-A	TF_motif_seq_0259	-897	+	CTACG	(Motif sequence only)
TdBCAT-A	TF_motif_seq_0380	-896	-	taCGTTC	(Motif sequence only)
TdBCAT-A	TF_motif_seq_0425	-881	+	TCAGGttg	(Motif sequence only)
TdBCAT-B	TF_motif_seq_0274	-876	+	TGACA	(Motif sequence only)
TdBCAT-B	TF_motif_seq_0274	-876	-	TGACA	(Motif sequence only)
TdBCAT-B	TF_motif_seq_0259	-871	+	CGACG	(Motif sequence only)
TdBCAT-B	TF_motif_seq_0259	-871	-	CGACG	(Motif sequence only)
TdBCAT-B	TF_motif_seq_0259	-868	+	CGACT	(Motif sequence only)
TdBCAT-B	TF_motif_seq_0324	-862	+	tCCGAC	(Motif sequence only)
TdBCAT-B	TF_motif_seq_0259	-860	+	CGACT	(Motif sequence only)
TdBCAT-A	TF_motif_seq_0390	-849	+	TCATCag	(Motif sequence only)
TdBCAT-B	TF_motif_seq_0380	-844	-	taAGTTA	(Motif sequence only)
TdBCAT-B	TF_motif_seq_0334	-837	-	tGCCCA	(Motif sequence only)
TdBCAT-B	TF_motif_seq_0259	-811	+	TGACG	(Motif sequence only)
TdBCAT-B	TF_motif_seq_0274	-811	-	TGACG	(Motif sequence only)
TdBCAT-B	TF_motif_seq_0259	-808	+	CGACA	(Motif sequence only)
TdBCAT-B	TF_motif_seq_0274	-808	-	CGACA	(Motif sequence only)
TdBCAT-A	TF_motif_seq_0274	-803	+	TGACA	(Motif sequence only)
TdBCAT-A	TF_motif_seq_0274	-803	-	TGACA	(Motif sequence only)
TdBCAT-A	TF_motif_seq_0390	-799	-	atGATGA	(Motif sequence only)
TdBCAT-B	TF_motif_seq_0259	-797	-	CTTCG	(Motif sequence only)
TdBCAT-A	TF_motif_seq_0274	-795	-	TGACT	(Motif sequence only)
TdBCAT-A	TF_motif_seq_0259	-787	+	CGACT	(Motif sequence only)
TdBCAT-B	TF_motif_seq_0274	-777	+	TGTAA	(Motif sequence only)
TdBCAT-A	TF_motif_seq_0130	-774	+	CAACAagttatgtc	(Motif sequence only)
TdBCAT-A	TF_motif_seq_0274	-764	+	TGTCC	(Motif sequence only)
TdBCAT-A	TF_motif_seq_0429	-764	-	tgtCCGGC	(Motif sequence only)
TdBCAT-A	TF_motif_seq_0324	-756	+	aCCGAC	(Motif sequence only)
TdBCAT-A	TF_motif_seq_0259	-754	+	CGACA	(Motif sequence only)
TdBCAT-A	TF_motif_seq_0274	-754	-	CGACA	(Motif sequence only)
TdBCAT-B	TF_motif_seq_0274	-750	+	TGACA	(Motif sequence only)
TdBCAT-B	TF_motif_seq_0274	-750	-	TGACA	(Motif sequence only)
TdBCAT-A	TF_motif_seq_0259	-743	+	GGACG	(Motif sequence only)
TdBCAT-A	TF_motif_seq_0274	-737	+	TGACA	(Motif sequence only)
TdBCAT-A	TF_motif_seq_0274	-737	-	TGACA	(Motif sequence only)
TdBCAT-B	TF_motif_seq_0389	-734	+	TATTTta	(Motif sequence only)
TdBCAT-A	TF_motif_seq_0259	-723	-	CTTCG	(Motif sequence only)
TdBCAT-B	TF_motif_seq_0378	-715	-	acTGTTA	(Motif sequence only)
TdBCAT-B	TF_motif_seq_0274	-713	+	TGTTA	(Motif sequence only)
TdBCAT-A	TF_motif_seq_0389	-701	+	TATTTac	(Motif sequence only)
TdBCAT-A	TF_motif_seq_0482	-700	-	atttACCGC	(Motif sequence only)
TdBCAT-A	TF_motif_seq_0321	-699	-	tTTACC	(Motif sequence only)
TdBCAT-A	TF_motif_seq_0429	-699	-	tttACCGC	(Motif sequence only)
TdBCAT-A	TF_motif_seq_0425	-692	+	CTAGGtgg	(Motif sequence only)
TdBCAT-A	TF_motif_seq_0274	-674	-	TGACT	(Motif sequence only)
TdBCAT-B	TF_motif_seq_0259	-673	+	AGACG	(Motif sequence only)
TdBCAT-B	TF_motif_seq_0363	-665	-	agATTGG	(Motif sequence only)
TdBCAT-B	TF_motif_seq_0321	-649	+	GGAAAa	(Motif sequence only)
TdBCAT-B	TF_motif_seq_0321	-648	+	GAAAAa	(Motif sequence only)
TdBCAT-B	TF_motif_seq_0334	-636	+	TGGGCa	(Motif sequence only)
TdBCAT-A	TF_motif_seq_0025	-635	+	CTATAattaa	(Motif sequence only)
TdBCAT-B	TF_motif_seq_0259	-631	+	AGACG	(Motif sequence only)
TdBCAT-B	TF_motif_seq_0274	-616	-	TTACA	(Motif sequence only)
TdBCAT-B	TF_motif_seq_0429	-616	-	ttaCACGC	(Motif sequence only)
TdBCAT-B	TF_motif_seq_0039	-615	-	tacacGCGGC	(Motif sequence only)
TdBCAT-B	TF_motif_seq_0429	-610	+	GCGGCaga	(Motif sequence only)
TdBCAT-A	TF_motif_seq_0321	-604	-	aTTTTC	(Motif sequence only)
TdBCAT-B	TF_motif_seq_0291	-603	+	AGCAGc	(Motif sequence only)
TdBCAT-A	TF_motif_seq_0429	-600	+	TCGGGaaa	(Motif sequence only)
TdBCAT-A	TF_motif_seq_0458	-600	-	tcGGGAAa	(Motif sequence only)
TdBCAT-A	TF_motif_seq_0321	-597	+	GGAAAa	(Motif sequence only)
TdBCAT-B	TF_motif_seq_0259	-596	+	CGACT	(Motif sequence only)
TdBCAT-A	TF_motif_seq_0321	-596	+	GAAAAa	(Motif sequence only)
TdBCAT-B	TF_motif_seq_0259	-593	+	CTACG	(Motif sequence only)
TdBCAT-B	TF_motif_seq_0259	-590	+	CGACT	(Motif sequence only)
TdBCAT-A	TF_motif_seq_0259	-579	+	AGACG	(Motif sequence only)
TdBCAT-B	TF_motif_seq_0425	-576	+	CCAGGagg	(Motif sequence only)
TdBCAT-A	TF_motif_seq_0274	-564	-	TTACA	(Motif sequence only)
TdBCAT-A	TF_motif_seq_0429	-564	-	ttaCACGC	(Motif sequence only)
TdBCAT-A	TF_motif_seq_0039	-563	-	tacacGCGGC	(Motif sequence only)
TdBCAT-B	TF_motif_seq_0274	-563	+	TGCCA	(Motif sequence only)
TdBCAT-B	TF_motif_seq_0274	-563	-	TGCCA	(Motif sequence only)
TdBCAT-B	TF_motif_seq_0425	-561	+	CCAGGcgc	(Motif sequence only)
TdBCAT-A	TF_motif_seq_0429	-558	+	GCGGCaga	(Motif sequence only)
TdBCAT-A	TF_motif_seq_0291	-551	+	AGCAGc	(Motif sequence only)
TdBCAT-A	TF_motif_seq_0259	-544	+	CGACT	(Motif sequence only)
TdBCAT-B	TF_motif_seq_0274	-543	+	TGTCA	(Motif sequence only)
TdBCAT-B	TF_motif_seq_0274	-543	-	TGTCA	(Motif sequence only)
TdBCAT-A	TF_motif_seq_0259	-541	+	CTACG	(Motif sequence only)
TdBCAT-A	TF_motif_seq_0259	-538	+	CGACT	(Motif sequence only)
TdBCAT-B	TF_motif_seq_0259	-535	-	CCTCG	(Motif sequence only)
TdBCAT-A	TF_motif_seq_0259	-532	-	CCTCG	(Motif sequence only)
TdBCAT-A	TF_motif_seq_0425	-524	+	CCAGGagg	(Motif sequence only)
TdBCAT-B	TF_motif_seq_0334	-512	+	TGGGCc	(Motif sequence only)
TdBCAT-A	TF_motif_seq_0274	-511	+	TGCCA	(Motif sequence only)
TdBCAT-A	TF_motif_seq_0274	-511	-	TGCCA	(Motif sequence only)
TdBCAT-B	TF_motif_seq_0334	-510	-	gGCCCA	(Motif sequence only)
TdBCAT-A	TF_motif_seq_0425	-509	+	CCAGGcgc	(Motif sequence only)
TdBCAT-B	TF_motif_seq_0259	-507	+	CCACG	(Motif sequence only)
TdBCAT-B	TF_motif_seq_0274	-502	+	GGTCA	(Motif sequence only)
TdBCAT-B	TF_motif_seq_0259	-493	+	CCACG	(Motif sequence only)
TdBCAT-A	TF_motif_seq_0259	-491	-	CGTCA	(Motif sequence only)
TdBCAT-A	TF_motif_seq_0274	-491	+	CGTCA	(Motif sequence only)
TdBCAT-A	TF_motif_seq_0259	-483	-	CCTCG	(Motif sequence only)
TdBCAT-B	TF_motif_seq_0274	-477	+	TGTCC	(Motif sequence only)
TdBCAT-B	TF_motif_seq_0259	-473	+	CGTCG	(Motif sequence only)
TdBCAT-B	TF_motif_seq_0259	-473	-	CGTCG	(Motif sequence only)
TdBCAT-B	TF_motif_seq_0259	-470	+	CGATG	(Motif sequence only)
TdBCAT-B	TF_motif_seq_0274	-461	+	TGTCT	(Motif sequence only)
TdBCAT-A	TF_motif_seq_0334	-460	+	TGGGCc	(Motif sequence only)
TdBCAT-A	TF_motif_seq_0334	-458	-	gGCCCA	(Motif sequence only)
TdBCAT-A	TF_motif_seq_0259	-455	+	CCACG	(Motif sequence only)
TdBCAT-B	TF_motif_seq_0259	-455	-	CGTCC	(Motif sequence only)
TdBCAT-B	TF_motif_seq_0425	-455	-	cgtCCTGG	(Motif sequence only)
TdBCAT-A	TF_motif_seq_0274	-450	+	GGTCA	(Motif sequence only)
TdBCAT-B	TF_motif_seq_0321	-449	+	GGAAAa	(Motif sequence only)
TdBCAT-A	TF_motif_seq_0274	-443	+	TGCCA	(Motif sequence only)
TdBCAT-A	TF_motif_seq_0274	-443	-	TGCCA	(Motif sequence only)
TdBCAT-B	TF_motif_seq_0291	-435	-	gCTGCT	(Motif sequence only)
TdBCAT-A	TF_motif_seq_0259	-434	+	CGTCG	(Motif sequence only)
TdBCAT-A	TF_motif_seq_0259	-434	-	CGTCG	(Motif sequence only)
TdBCAT-A	TF_motif_seq_0259	-431	+	CGATG	(Motif sequence only)
TdBCAT-A	TF_motif_seq_0274	-421	+	TGTCT	(Motif sequence only)
TdBCAT-B	TF_motif_seq_0458	-421	+	tTTGGCac	(Motif sequence only)
TdBCAT-B	TF_motif_seq_0274	-419	+	TGGCA	(Motif sequence only)
TdBCAT-B	TF_motif_seq_0274	-419	-	TGGCA	(Motif sequence only)
TdBCAT-A	TF_motif_seq_0425	-412	+	CCAGGaga	(Motif sequence only)
TdBCAT-B	TF_motif_seq_0259	-404	-	CGTAG	(Motif sequence only)
TdBCAT-A	TF_motif_seq_0291	-395	-	gCTGCT	(Motif sequence only)
TdBCAT-B	TF_motif_seq_0259	-391	-	CGTCT	(Motif sequence only)
TdBCAT-B	TF_motif_seq_0274	-385	+	TGTCA	(Motif sequence only)
TdBCAT-B	TF_motif_seq_0274	-385	-	TGTCA	(Motif sequence only)
TdBCAT-A	TF_motif_seq_0259	-382	-	CTTCG	(Motif sequence only)
TdBCAT-A	TF_motif_seq_0259	-379	+	CGGCG	(Motif sequence only)
TdBCAT-A	TF_motif_seq_0259	-379	-	CGGCG	(Motif sequence only)
TdBCAT-B	TF_motif_seq_0363	-379	-	acATTGG	(Motif sequence only)
TdBCAT-B	TF_motif_seq_0274	-375	+	TGGCA	(Motif sequence only)
TdBCAT-B	TF_motif_seq_0274	-375	-	TGGCA	(Motif sequence only)
TdBCAT-B	TF_motif_seq_0274	-362	+	TGTCA	(Motif sequence only)
TdBCAT-B	TF_motif_seq_0274	-362	-	TGTCA	(Motif sequence only)
TdBCAT-A	TF_motif_seq_0274	-358	-	TAACA	(Motif sequence only)
TdBCAT-A	TF_motif_seq_0378	-358	+	TAACAgg	(Motif sequence only)
TdBCAT-B	TF_motif_seq_0458	-354	+	aTTGCCga	(Motif sequence only)
TdBCAT-B	TF_motif_seq_0380	-339	+	TAACGca	(Motif sequence only)
TdBCAT-B	TF_motif_seq_0002	-338	+	AACGCatgct	(Motif sequence only)
TdBCAT-A	TF_motif_seq_0274	-327	+	TGTCA	(Motif sequence only)
TdBCAT-A	TF_motif_seq_0274	-327	-	TGTCA	(Motif sequence only)
TdBCAT-B	TF_motif_seq_0378	-322	-	tgTGTTA	(Motif sequence only)
TdBCAT-B	TF_motif_seq_0274	-320	+	TGTTA	(Motif sequence only)
TdBCAT-A	TF_motif_seq_0458	-317	-	ccGCCAAa	(Motif sequence only)
TdBCAT-B	TF_motif_seq_0458	-315	+	aTTCGCca	(Motif sequence only)
TdBCAT-A	TF_motif_seq_0274	-303	+	TGCCA	(Motif sequence only)
TdBCAT-A	TF_motif_seq_0274	-303	-	TGCCA	(Motif sequence only)
TdBCAT-B	TF_motif_seq_0363	-300	+	CCAATgc	(Motif sequence only)
TdBCAT-A	TF_motif_seq_0321	-295	-	aTTACC	(Motif sequence only)
TdBCAT-A	TF_motif_seq_0380	-293	+	TACCGta	(Motif sequence only)
TdBCAT-B	TF_motif_seq_0343	-292	-	tgTGTTT	(Motif sequence only)
TdBCAT-B	TF_motif_seq_0274	-288	+	TTTCA	(Motif sequence only)
TdBCAT-A	TF_motif_seq_0429	-288	-	tatCCTGC	(Motif sequence only)
TdBCAT-B	TF_motif_seq_0309	-281	-	aAAAGG	(Motif sequence only)
TdBCAT-B	TF_motif_seq_0274	-275	+	TATCA	(Motif sequence only)
TdBCAT-A	TF_motif_seq_0378	-273	-	tgTGTTA	(Motif sequence only)
TdBCAT-A	TF_motif_seq_0274	-271	+	TGTTA	(Motif sequence only)
TdBCAT-B	TF_motif_seq_0363	-266	+	CCAATgc	(Motif sequence only)
TdBCAT-A	TF_motif_seq_0363	-251	+	CCAATgc	(Motif sequence only)
TdBCAT-A	TF_motif_seq_0343	-243	-	tgTGTTT	(Motif sequence only)
TdBCAT-B	TF_motif_seq_0274	-238	-	TGATA	(Motif sequence only)
TdBCAT-A	TF_motif_seq_0490	-238	-	ttccTAAAC	(Motif sequence only)
TdBCAT-A	TF_motif_seq_0363	-230	+	CCAATgc	(Motif sequence only)
TdBCAT-B	TF_motif_seq_0458	-229	-	acGGCAAa	(Motif sequence only)
TdBCAT-B	TF_motif_seq_0274	-212	+	TGCCA	(Motif sequence only)
TdBCAT-B	TF_motif_seq_0274	-212	-	TGCCA	(Motif sequence only)
TdBCAT-A	TF_motif_seq_0259	-206	-	GGTCG	(Motif sequence only)
TdBCAT-A	TF_motif_seq_0324	-205	-	GTCGGa	(Motif sequence only)
TdBCAT-B	TF_motif_seq_0259	-201	+	CCACG	(Motif sequence only)
TdBCAT-B	TF_motif_seq_0259	-198	+	CGACC	(Motif sequence only)
TdBCAT-A	TF_motif_seq_0259	-183	+	CAACG	(Motif sequence only)
TdBCAT-A	TF_motif_seq_0002	-182	+	AACGCtttgc	(Motif sequence only)
TdBCAT-A	TF_motif_seq_0274	-175	+	TGCCA	(Motif sequence only)
TdBCAT-A	TF_motif_seq_0274	-175	-	TGCCA	(Motif sequence only)
TdBCAT-B	TF_motif_seq_0274	-167	+	TGCCA	(Motif sequence only)
TdBCAT-B	TF_motif_seq_0274	-167	-	TGCCA	(Motif sequence only)
TdBCAT-A	TF_motif_seq_0259	-164	+	CCACG	(Motif sequence only)
TdBCAT-A	TF_motif_seq_0259	-161	+	CGACC	(Motif sequence only)
TdBCAT-A	TF_motif_seq_0372	-140	-	caCGAAC	(Motif sequence only)
TdBCAT-B	TF_motif_seq_0259	-133	-	CGTCC	(Motif sequence only)
TdBCAT-A	TF_motif_seq_0274	-129	+	TGCCA	(Motif sequence only)
TdBCAT-A	TF_motif_seq_0274	-129	-	TGCCA	(Motif sequence only)
TdBCAT-B	TF_motif_seq_0013	-127	+	AGTACctagc	(Motif sequence only)
TdBCAT-A	TF_motif_seq_0391	-121	-	taACTCA	(Motif sequence only)
TdBCAT-B	TF_motif_seq_0490	-98	-	tcgcAAAAC	(Motif sequence only)
TdBCAT-A	TF_motif_seq_0259	-93	-	CGTAG	(Motif sequence only)
TdBCAT-B	TF_motif_seq_0380	-93	+	AAACGta	(Motif sequence only)
TdBCAT-B	TF_motif_seq_0429	-70	-	ttgCTCGC	(Motif sequence only)
TdBCAT-A	TF_motif_seq_0429	-62	-	ttgCTCGC	(Motif sequence only)
TdBCAT-A	TF_motif_seq_0259	-57	+	CGCCG	(Motif sequence only)
TdBCAT-A	TF_motif_seq_0259	-57	-	CGCCG	(Motif sequence only)
TdBCAT-B	TF_motif_seq_0259	-51	+	CAACG	(Motif sequence only)
TdBCAT-B	TF_motif_seq_0358	-51	+	CAACGtt	(Motif sequence only)
TdBCAT-B	TF_motif_seq_0358	-50	-	aaCGTTG	(Motif sequence only)
TdBCAT-B	TF_motif_seq_0259	-48	-	CGTTG	(Motif sequence only)
TdBCAT-A	TF_motif_seq_0259	-47	-	GGTCG	(Motif sequence only)
TdBCAT-A	TF_motif_seq_0458	-28	+	tTTGGCga	(Motif sequence only)
TdBCAT-A	TF_motif_seq_0372	-12	+	GTACGtg	(Motif sequence only)
TdBCAT-B	TF_motif_seq_0372	-12	+	GTACGtg	(Motif sequence only)
TdBCAT-A	TF_motif_seq_0372	-8	+	GTGCGtg	(Motif sequence only)
TdBCAT-B	TF_motif_seq_0372	-8	+	GTGCGtg	(Motif sequence only)
TdBCAT-A	TF_motif_seq_0316	-978	+	GATGTc	(Others)	L345501
TdBCAT-A	TF_motif_seq_0316	-978	-	gATGTC	(Others)	L345501
TdBCAT-A	TF_motif_seq_0327	-896	+	TACGTt	(Others)	L34551
TdBCAT-A	TF_motif_seq_0327	-896	-	tACGTT	(Others)	L34551
TdBCAT-B	TF_motif_seq_0316	-870	+	GACGAc	(Others)	L345501
TdBCAT-B	TF_motif_seq_0316	-870	-	gACGAC	(Others)	L345501
TdBCAT-B	TF_motif_seq_0316	-810	+	GACGAc	(Others)	L345501
TdBCAT-B	TF_motif_seq_0316	-810	-	gACGAC	(Others)	L345501
TdBCAT-A	TF_motif_seq_0316	-794	+	GACTTc	(Others)	L345501
TdBCAT-A	TF_motif_seq_0316	-794	-	gACTTC	(Others)	L345501
TdBCAT-B	TF_motif_seq_0316	-672	+	GACGTa	(Others)	L345501
TdBCAT-B	TF_motif_seq_0316	-672	-	gACGTA	(Others)	L345501
TdBCAT-B	TF_motif_seq_0327	-672	+	GACGTa	(Others)	L34551
TdBCAT-B	TF_motif_seq_0327	-672	-	gACGTA	(Others)	L34551
TdBCAT-B	TF_motif_seq_0316	-630	+	GACGCc	(Others)	L345501
TdBCAT-B	TF_motif_seq_0316	-630	-	gACGCC	(Others)	L345501
TdBCAT-A	TF_motif_seq_0316	-578	+	GACGCc	(Others)	L345501
TdBCAT-A	TF_motif_seq_0316	-578	-	gACGCC	(Others)	L345501
TdBCAT-A	TF_motif_seq_0316	-537	+	GACTTc	(Others)	L345501
TdBCAT-A	TF_motif_seq_0316	-537	-	gACTTC	(Others)	L345501
TdBCAT-B	TF_motif_seq_0327	-125	+	TACCTa	(Others)	L34551
TdBCAT-B	TF_motif_seq_0327	-125	-	tACCTA	(Others)	L34551
TdBCAT-B	TF_motif_seq_0327	-92	+	AACGTa	(Others)	L34551
TdBCAT-B	TF_motif_seq_0327	-92	-	aACGTA	(Others)	L34551
TdBCAT-A	TF_motif_seq_0327	-11	+	TACGTg	(Others)	L34551
TdBCAT-A	TF_motif_seq_0327	-11	-	tACGTG	(Others)	L34551
TdBCAT-B	TF_motif_seq_0327	-11	+	TACGTg	(Others)	L34551
TdBCAT-B	TF_motif_seq_0327	-11	-	tACGTG	(Others)	L34551
TdBCAT-B	TF_motif_seq_0347	-777	-	tgTAATT	Alpha-amylase	M24286;M24287
TdBCAT-B	TF_motif_seq_0282	-739	-	tTTATT	Alpha-amylase	M24286;M24287
TdBCAT-B	TF_motif_seq_0379	-715	-	acTGTTA	Alpha-amylase	X16509
TdBCAT-A	TF_motif_seq_0282	-663	-	tTTATT	Alpha-amylase	M24286;M24287
TdBCAT-A	TF_motif_seq_0347	-634	-	taTAATT	Alpha-amylase	M24286;M24287
TdBCAT-A	TF_motif_seq_0347	-631	+	AATTAaa	Alpha-amylase	M24286;M24287
TdBCAT-A	TF_motif_seq_0379	-358	+	TAACAgg	Alpha-amylase	X16509
TdBCAT-B	TF_motif_seq_0379	-322	-	tgTGTTA	Alpha-amylase	X16509
TdBCAT-B	TF_motif_seq_0347	-319	-	gtTAATT	Alpha-amylase	M24286;M24287
TdBCAT-A	TF_motif_seq_0379	-273	-	tgTGTTA	Alpha-amylase	X16509
TdBCAT-A	TFmatrixID_0119	-947	-	cgGTCGGgga	AP2	Os06g0553700;Os08g0454000;Os10g0560700;Os02g0231000;Os02g0656600;Os02g0657000;Os04g0549700;Os04g0549800;Os04g0550200;Os06g0166400
TdBCAT-A	TFmatrixID_0080	-758	+	gcaCCGACaa	AP2	Os06g0553700;Os10g0560700;Os11g0242300;Os01g0200600;Os02g0231000;Os02g0656600;Os02g0657000;Os04g0549700;Os04g0549800;Os04g0550200
TdBCAT-A	TFmatrixID_0119	-758	+	gcaCCGACaa	AP2	Os06g0553700;Os08g0454000;Os10g0560700;Os02g0231000;Os02g0656600;Os02g0657000;Os04g0549700;Os04g0549800;Os04g0550200;Os06g0166400
TdBCAT-A	TFmatrixID_0088	-757	+	caCCGACa	AP2	Os06g0553700;Os10g0560700;Os01g0200600;Os02g0231000;Os02g0656600;Os02g0657000;Os04g0549700;Os04g0549800;Os04g0550200
TdBCAT-A	TFmatrixID_0118	-757	+	caCCGACa	AP2	Os08g0454000
TdBCAT-A	TFmatrixID_0121	-946	-	gGTCGGgg	AP2; ERF	Os06g0553700;Os10g0560700;Os02g0231000;Os02g0656600;Os02g0657000;Os04g0549700;Os04g0549800;Os04g0550200;Os06g0166400;Os06g0197600;Os04g0648900
TdBCAT-B	TFmatrixID_0066	-817	-	gggCGGTGa	AP2; ERF	Os08g0565200;Os01g0165000;Os03g0174400;Os03g0191900;Os05g0346200
TdBCAT-A	TFmatrixID_0066	-758	+	gCACCGaca	AP2; ERF	Os08g0565200;Os01g0165000;Os03g0174400;Os03g0191900;Os05g0346200
TdBCAT-A	TFmatrixID_0086	-758	+	gcaCCGACaa	AP2; ERF	Os06g0553700;Os10g0560700;Os11g0242300;Os02g0231000;Os02g0558700;Os02g0656600;Os02g0657000;Os04g0430800;Os04g0549700;Os04g0549800;Os04g0550200;Os06g0127100
TdBCAT-A	TFmatrixID_0109	-758	+	gcaCCGACaa	AP2; ERF	Os02g0677300;Os06g0127100
TdBCAT-A	TFmatrixID_0067	-757	+	caCCGACaag	AP2; ERF	Os06g0222400;Os08g0408500;Os09g0369000;Os10g0371100;Os02g0638650;Os02g0752800;Os03g0174400;Os03g0191900;Os04g0529100;Os05g0351200;Os05g0572000
TdBCAT-A	TFmatrixID_0085	-757	+	caCCGACaag	AP2; ERF	Os06g0553700;Os10g0560700;Os11g0242300;Os02g0231000;Os02g0558700;Os02g0656600;Os02g0657000;Os04g0430800;Os04g0549700;Os04g0549800;Os04g0550200;Os06g0127100
TdBCAT-A	TFmatrixID_0121	-757	+	caCCGACa	AP2; ERF	Os06g0553700;Os10g0560700;Os02g0231000;Os02g0656600;Os02g0657000;Os04g0549700;Os04g0549800;Os04g0550200;Os06g0166400;Os06g0197600;Os04g0648900
TdBCAT-A	TF_motif_seq_0292	-993	-	GTCGGa	AP2; ERF;ERF	Os08g0565200;Os01g0165000;Os02g0677300;Os03g0174400;Os05g0346200;Os06g0127100;Os01g0968800;Os04g0572400;Os05g0473300;Os06g0165600;Os08g0545500;Os09g0522000;Os09g0522100;Os09g0522200
TdBCAT-A	TF_motif_seq_0292	-945	-	GTCGGg	AP2; ERF;ERF	Os08g0565200;Os01g0165000;Os02g0677300;Os03g0174400;Os05g0346200;Os06g0127100;Os01g0968800;Os04g0572400;Os05g0473300;Os06g0165600;Os08g0545500;Os09g0522000;Os09g0522100;Os09g0522200
TdBCAT-B	TF_motif_seq_0292	-862	+	tCCGAC	AP2; ERF;ERF	Os08g0565200;Os01g0165000;Os02g0677300;Os03g0174400;Os05g0346200;Os06g0127100;Os01g0968800;Os04g0572400;Os05g0473300;Os06g0165600;Os08g0545500;Os09g0522000;Os09g0522100;Os09g0522200
TdBCAT-A	TF_motif_seq_0292	-756	+	aCCGAC	AP2; ERF;ERF	Os08g0565200;Os01g0165000;Os02g0677300;Os03g0174400;Os05g0346200;Os06g0127100;Os01g0968800;Os04g0572400;Os05g0473300;Os06g0165600;Os08g0545500;Os09g0522000;Os09g0522100;Os09g0522200
TdBCAT-A	TF_motif_seq_0292	-205	-	GTCGGa	AP2; ERF;ERF	Os08g0565200;Os01g0165000;Os02g0677300;Os03g0174400;Os05g0346200;Os06g0127100;Os01g0968800;Os04g0572400;Os05g0473300;Os06g0165600;Os08g0545500;Os09g0522000;Os09g0522100;Os09g0522200
TdBCAT-B	TFmatrixID_0146	-746	-	ATTATtttt	AT-Hook	Os07g0184800
TdBCAT-B	TFmatrixID_0154	-746	-	atTATTTt	AT-Hook	Os07g0184800
TdBCAT-B	TFmatrixID_0148	-744	-	tATTTTtt	AT-Hook	Os02g0824300;Os06g0326000;Os07g0184800;Os08g0512400;Os09g0491708
TdBCAT-B	TFmatrixID_0131	-739	-	TTTATtatt	AT-Hook	Os06g0326000;Os07g0184800;Os08g0512400;Os09g0491708
TdBCAT-B	TFmatrixID_0136	-739	-	TTTATtat	AT-Hook	Os07g0184800
TdBCAT-B	TFmatrixID_0146	-736	-	ATTATttta	AT-Hook	Os07g0184800
TdBCAT-B	TFmatrixID_0154	-736	-	atTATTTt	AT-Hook	Os07g0184800
TdBCAT-B	TFmatrixID_0150	-709	+	atAATATttt	AT-Hook	Os01g0835600
TdBCAT-B	TFmatrixID_0150	-709	-	ataATATTtt	AT-Hook	Os01g0835600
TdBCAT-B	TFmatrixID_0149	-708	+	taaTATTTtt	AT-Hook	Os11g0602200
TdBCAT-B	TFmatrixID_0154	-707	-	aaTATTTt	AT-Hook	Os07g0184800
TdBCAT-B	TFmatrixID_0137	-706	-	ATATTttt	AT-Hook	Os07g0184800
TdBCAT-B	TFmatrixID_0580	-706	-	aTATTTt	AT-Hook	Os01g0835600
TdBCAT-B	TFmatrixID_0148	-705	-	tATTTTtt	AT-Hook	Os02g0824300;Os06g0326000;Os07g0184800;Os08g0512400;Os09g0491708
TdBCAT-A	TFmatrixID_0131	-663	-	TTTATtatt	AT-Hook	Os06g0326000;Os07g0184800;Os08g0512400;Os09g0491708
TdBCAT-A	TFmatrixID_0136	-663	-	TTTATtat	AT-Hook	Os07g0184800
TdBCAT-A	TFmatrixID_0146	-660	-	ATTATttct	AT-Hook	Os07g0184800
TdBCAT-B	TFmatrixID_0133	-650	+	tggaAAAAA	AT-Hook	Os01g0835600
TdBCAT-B	TFmatrixID_0148	-647	+	aaAAAATt	AT-Hook	Os02g0824300;Os06g0326000;Os07g0184800;Os08g0512400;Os09g0491708
TdBCAT-B	TFmatrixID_0152	-646	+	aaAAATT	AT-Hook	Os06g0326000
TdBCAT-A	TFmatrixID_0580	-606	-	gTATTTt	AT-Hook	Os01g0835600
TdBCAT-A	TFmatrixID_0133	-599	+	cgggAAAAA	AT-Hook	Os01g0835600
TdBCAT-A	TFmatrixID_0133	-598	+	gggaAAAAA	AT-Hook	Os01g0835600
TdBCAT-A	TFmatrixID_0148	-595	+	aaAAAATt	AT-Hook	Os02g0824300;Os06g0326000;Os07g0184800;Os08g0512400;Os09g0491708
TdBCAT-A	TFmatrixID_0152	-594	+	aaAAATT	AT-Hook	Os06g0326000
TdBCAT-B	TFmatrixID_0581	-380	+	aacattggcaAATAT	AT-Hook	Os01g0835600
TdBCAT-B	TFmatrixID_0149	-373	-	gcAAATAtct	AT-Hook	Os11g0602200
TdBCAT-B	TFmatrixID_0130	-78	-	ccatTATATt	AT-Hook	Os06g0326000;Os07g0184800;Os08g0512400;Os09g0491708
TdBCAT-B	TFmatrixID_0146	-76	-	ATTATattg	AT-Hook	Os07g0184800
TdBCAT-A	TF_motif_seq_0256	-998	-	GCATG	B3	Os04g0676600;Os08g0101000
TdBCAT-A	TF_motif_seq_0256	-997	+	CATGG	B3	Os04g0676600;Os08g0101000
TdBCAT-A	TF_motif_seq_0256	-990	-	GGATG	B3	Os04g0676600;Os08g0101000
TdBCAT-A	TF_motif_seq_0256	-979	-	GGATG	B3	Os04g0676600;Os08g0101000
TdBCAT-B	TF_motif_seq_0256	-973	+	AATGC	B3	Os04g0676600;Os08g0101000
TdBCAT-B	TF_motif_seq_0256	-966	-	CCATG	B3	Os04g0676600;Os08g0101000
TdBCAT-B	TF_motif_seq_0256	-965	+	CATGG	B3	Os04g0676600;Os08g0101000
TdBCAT-B	TF_motif_seq_0256	-919	-	GCCTG	B3	Os04g0676600;Os08g0101000
TdBCAT-A	TF_motif_seq_0256	-891	-	TCATG	B3	Os04g0676600;Os08g0101000
TdBCAT-A	TF_motif_seq_0256	-890	+	CATGC	B3	Os04g0676600;Os08g0101000
TdBCAT-B	TF_motif_seq_0256	-839	+	TATGC	B3	Os04g0676600;Os08g0101000
TdBCAT-A	TF_motif_seq_0256	-801	-	ACATG	B3	Os04g0676600;Os08g0101000
TdBCAT-A	TF_motif_seq_0256	-800	+	CATGA	B3	Os04g0676600;Os08g0101000
TdBCAT-A	TF_motif_seq_0256	-645	+	CATTC	B3	Os04g0676600;Os08g0101000
TdBCAT-A	TF_motif_seq_0256	-639	+	AATGC	B3	Os04g0676600;Os08g0101000
TdBCAT-B	TF_motif_seq_0256	-622	+	CACGC	B3	Os04g0676600;Os08g0101000
TdBCAT-A	TF_motif_seq_0256	-614	-	GAATG	B3	Os04g0676600;Os08g0101000
TdBCAT-B	TF_motif_seq_0256	-613	+	CACGC	B3	Os04g0676600;Os08g0101000
TdBCAT-B	TF_motif_seq_0256	-587	+	CTTGC	B3	Os04g0676600;Os08g0101000
TdBCAT-A	TF_motif_seq_0256	-570	+	CACGC	B3	Os04g0676600;Os08g0101000
TdBCAT-B	TF_motif_seq_0256	-565	+	CGTGC	B3	Os04g0676600;Os08g0101000
TdBCAT-A	TF_motif_seq_0256	-561	+	CACGC	B3	Os04g0676600;Os08g0101000
TdBCAT-B	TF_motif_seq_0256	-560	+	CAGGC	B3	Os04g0676600;Os08g0101000
TdBCAT-B	TF_motif_seq_0256	-515	-	GCCTG	B3	Os04g0676600;Os08g0101000
TdBCAT-A	TF_motif_seq_0256	-513	+	CGTGC	B3	Os04g0676600;Os08g0101000
TdBCAT-A	TF_motif_seq_0256	-508	+	CAGGC	B3	Os04g0676600;Os08g0101000
TdBCAT-B	TF_motif_seq_0256	-483	+	CATCC	B3	Os04g0676600;Os08g0101000
TdBCAT-B	TF_motif_seq_0256	-480	-	CCATG	B3	Os04g0676600;Os08g0101000
TdBCAT-B	TF_motif_seq_0256	-479	+	CATGT	B3	Os04g0676600;Os08g0101000
TdBCAT-A	TF_motif_seq_0256	-463	-	GCCTG	B3	Os04g0676600;Os08g0101000
TdBCAT-B	TF_motif_seq_0256	-443	-	GCAAG	B3	Os04g0676600;Os08g0101000
TdBCAT-B	TF_motif_seq_0256	-442	+	CAAGC	B3	Os04g0676600;Os08g0101000
TdBCAT-B	TF_motif_seq_0256	-439	-	GCTTG	B3	Os04g0676600;Os08g0101000
TdBCAT-B	TF_motif_seq_0256	-438	+	CTTGC	B3	Os04g0676600;Os08g0101000
TdBCAT-A	TF_motif_seq_0256	-415	+	CATCC	B3	Os04g0676600;Os08g0101000
TdBCAT-B	TF_motif_seq_0256	-414	+	CAGGC	B3	Os04g0676600;Os08g0101000
TdBCAT-A	TF_motif_seq_0256	-403	-	GCAAG	B3	Os04g0676600;Os08g0101000
TdBCAT-A	TF_motif_seq_0256	-375	-	GCACG	B3	Os04g0676600;Os08g0101000
TdBCAT-A	TF_motif_seq_0256	-374	+	CACGC	B3	Os04g0676600;Os08g0101000
TdBCAT-B	TF_motif_seq_0256	-344	+	CCTGC	B3	Os04g0676600;Os08g0101000
TdBCAT-B	TFmatrixID_0509	-337	-	acGCATGct	B3	Os01g0911700
TdBCAT-B	TFmatrixID_0509	-336	+	cgCATGCta	B3	Os01g0911700
TdBCAT-B	TF_motif_seq_0256	-335	-	GCATG	B3	Os04g0676600;Os08g0101000
TdBCAT-B	TF_motif_seq_0256	-334	+	CATGC	B3	Os04g0676600;Os08g0101000
TdBCAT-B	TF_motif_seq_0256	-328	+	AATGC	B3	Os04g0676600;Os08g0101000
TdBCAT-B	TF_motif_seq_0256	-325	-	GCATG	B3	Os04g0676600;Os08g0101000
TdBCAT-B	TF_motif_seq_0256	-324	+	CATGT	B3	Os04g0676600;Os08g0101000
TdBCAT-A	TF_motif_seq_0256	-320	+	CATCC	B3	Os04g0676600;Os08g0101000
TdBCAT-B	TF_motif_seq_0256	-298	+	AATGC	B3	Os04g0676600;Os08g0101000
TdBCAT-B	TF_motif_seq_0256	-295	-	GCATG	B3	Os04g0676600;Os08g0101000
TdBCAT-B	TF_motif_seq_0256	-294	+	CATGT	B3	Os04g0676600;Os08g0101000
TdBCAT-A	TF_motif_seq_0256	-285	+	CCTGC	B3	Os04g0676600;Os08g0101000
TdBCAT-A	TF_motif_seq_0256	-279	+	AATGC	B3	Os04g0676600;Os08g0101000
TdBCAT-A	TF_motif_seq_0256	-276	-	GCATG	B3	Os04g0676600;Os08g0101000
TdBCAT-A	TF_motif_seq_0256	-275	+	CATGT	B3	Os04g0676600;Os08g0101000
TdBCAT-B	TF_motif_seq_0256	-264	+	AATGC	B3	Os04g0676600;Os08g0101000
TdBCAT-B	TF_motif_seq_0256	-261	-	GCATG	B3	Os04g0676600;Os08g0101000
TdBCAT-B	TF_motif_seq_0256	-260	+	CATGT	B3	Os04g0676600;Os08g0101000
TdBCAT-A	TF_motif_seq_0256	-249	+	AATGC	B3	Os04g0676600;Os08g0101000
TdBCAT-A	TF_motif_seq_0256	-246	-	GCATG	B3	Os04g0676600;Os08g0101000
TdBCAT-A	TF_motif_seq_0256	-245	+	CATGT	B3	Os04g0676600;Os08g0101000
TdBCAT-B	TF_motif_seq_0256	-241	-	GTATG	B3	Os04g0676600;Os08g0101000
TdBCAT-B	TF_motif_seq_0256	-231	-	GCACG	B3	Os04g0676600;Os08g0101000
TdBCAT-A	TF_motif_seq_0256	-228	+	AATGC	B3	Os04g0676600;Os08g0101000
TdBCAT-A	TF_motif_seq_0256	-225	-	GCATG	B3	Os04g0676600;Os08g0101000
TdBCAT-A	TF_motif_seq_0256	-224	+	CATGT	B3	Os04g0676600;Os08g0101000
TdBCAT-B	TF_motif_seq_0256	-214	+	CTTGC	B3	Os04g0676600;Os08g0101000
TdBCAT-A	TF_motif_seq_0256	-195	-	GCACG	B3	Os04g0676600;Os08g0101000
TdBCAT-B	TF_motif_seq_0256	-113	+	CCTGC	B3	Os04g0676600;Os08g0101000
TdBCAT-B	TF_motif_seq_0256	-105	-	GCATA	B3	Os04g0676600;Os08g0101000
TdBCAT-A	TF_motif_seq_0256	-9	+	CGTGC	B3	Os04g0676600;Os08g0101000
TdBCAT-B	TF_motif_seq_0256	-9	+	CGTGC	B3	Os04g0676600;Os08g0101000
TdBCAT-A	TF_motif_seq_0256	-6	-	GCGTG	B3	Os04g0676600;Os08g0101000
TdBCAT-B	TF_motif_seq_0256	-6	-	GCGTG	B3	Os04g0676600;Os08g0101000
TdBCAT-A	TF_motif_seq_0256	-5	+	CGTGC	B3	Os04g0676600;Os08g0101000
TdBCAT-B	TF_motif_seq_0256	-5	+	CGTGC	B3	Os04g0676600;Os08g0101000
TdBCAT-A	TFmatrixID_0156	-756	+	acCGACAag	B3; ARF	Os02g0141100;Os02g0164900;Os04g0664400;Os04g0671900;Os06g0196700;Os06g0677800;Os06g0702600;Os08g0520500;Os11g0523800;Os12g0613700
TdBCAT-A	TF_motif_seq_0335	-972	+	TGTCTc	B3; ARF;ARF	Os02g0141100;Os02g0164900;Os04g0664400;Os04g0671900;Os06g0196700;Os06g0677800;Os06g0702600;Os08g0520500;Os11g0523800;Os12g0613700;Os01g0236300;Os01g0670800;Os01g0753500;Os01g0927600;Os02g0557200;Os02g0628600;Os04g0442000;Os04g0519700;Os04g0690600;Os05g0515400;Os05g0563400;Os06g0685700;Os10g0479900;Os12g0479400
TdBCAT-B	TF_motif_seq_0335	-461	+	TGTCTc	B3; ARF;ARF	Os02g0141100;Os02g0164900;Os04g0664400;Os04g0671900;Os06g0196700;Os06g0677800;Os06g0702600;Os08g0520500;Os11g0523800;Os12g0613700;Os01g0236300;Os01g0670800;Os01g0753500;Os01g0927600;Os02g0557200;Os02g0628600;Os04g0442000;Os04g0519700;Os04g0690600;Os05g0515400;Os05g0563400;Os06g0685700;Os10g0479900;Os12g0479400
TdBCAT-A	TF_motif_seq_0335	-421	+	TGTCTc	B3; ARF;ARF	Os02g0141100;Os02g0164900;Os04g0664400;Os04g0671900;Os06g0196700;Os06g0677800;Os06g0702600;Os08g0520500;Os11g0523800;Os12g0613700;Os01g0236300;Os01g0670800;Os01g0753500;Os01g0927600;Os02g0557200;Os02g0628600;Os04g0442000;Os04g0519700;Os04g0690600;Os05g0515400;Os05g0563400;Os06g0685700;Os10g0479900;Os12g0479400
TdBCAT-B	TFmatrixID_0195	-813	-	ggTGACGaca	B3; bZIP;bZIP	LOC_Os02g22280;Os01g0279900;Os01g0808100;Os01g0859500;Os02g0194900;Os03g0318600;Os04g0637000;Os05g0443850;Os05g0492000;Os06g0265400;Os06g0614100;Os07g0687700;Os08g0176900;Os09g0280500;Os09g0489500;Os11g0152700;Os12g0152900
TdBCAT-A	TFmatrixID_0195	-494	+	ctcCGTCAct	B3; bZIP;bZIP	LOC_Os02g22280;Os01g0279900;Os01g0808100;Os01g0859500;Os02g0194900;Os03g0318600;Os04g0637000;Os05g0443850;Os05g0492000;Os06g0265400;Os06g0614100;Os07g0687700;Os08g0176900;Os09g0280500;Os09g0489500;Os11g0152700;Os12g0152900
TdBCAT-A	TF_motif_seq_0312	-376	-	cGCACG	BES1	Os07g0580500
TdBCAT-A	TF_motif_seq_0312	-9	+	CGTGCg	BES1	Os07g0580500
TdBCAT-B	TF_motif_seq_0312	-9	+	CGTGCg	BES1	Os07g0580500
TdBCAT-B	TFmatrixID_0176	-591	+	acgACTTGc	bHLH	Os01g0900800;Os02g0564700;Os02g0603600;Os04g0489600;Os08g0506700;Os09g0487900
TdBCAT-B	TFmatrixID_0174	-584	+	GCTCGttc	bHLH	Os01g0915600;Os02g0564700;Os02g0705500;Os03g0231950;Os03g0728900;Os03g0802900;Os04g0350700;Os05g0103000;Os06g0193400;Os06g0275600;Os07g0193800;Os08g0487700;Os08g0524800;Os08g0536800;Os09g0417400;Os09g0474100;Os09g0501600;Os09g0510500
TdBCAT-B	TFmatrixID_0174	-584	-	gctCGTTC	bHLH	Os01g0915600;Os02g0564700;Os02g0705500;Os03g0231950;Os03g0728900;Os03g0802900;Os04g0350700;Os05g0103000;Os06g0193400;Os06g0275600;Os07g0193800;Os08g0487700;Os08g0524800;Os08g0536800;Os09g0417400;Os09g0474100;Os09g0501600;Os09g0510500
TdBCAT-B	TFmatrixID_0174	-573	-	ggaGGTGC	bHLH	Os01g0915600;Os02g0564700;Os02g0705500;Os03g0231950;Os03g0728900;Os03g0802900;Os04g0350700;Os05g0103000;Os06g0193400;Os06g0275600;Os07g0193800;Os08g0487700;Os08g0524800;Os08g0536800;Os09g0417400;Os09g0474100;Os09g0501600;Os09g0510500
TdBCAT-A	TFmatrixID_0174	-521	-	ggaGGTGC	bHLH	Os01g0915600;Os02g0564700;Os02g0705500;Os03g0231950;Os03g0728900;Os03g0802900;Os04g0350700;Os05g0103000;Os06g0193400;Os06g0275600;Os07g0193800;Os08g0487700;Os08g0524800;Os08g0536800;Os09g0417400;Os09g0474100;Os09g0501600;Os09g0510500
TdBCAT-B	TFmatrixID_0174	-417	+	GCACAggc	bHLH	Os01g0915600;Os02g0564700;Os02g0705500;Os03g0231950;Os03g0728900;Os03g0802900;Os04g0350700;Os05g0103000;Os06g0193400;Os06g0275600;Os07g0193800;Os08g0487700;Os08g0524800;Os08g0536800;Os09g0417400;Os09g0474100;Os09g0501600;Os09g0510500
TdBCAT-B	TFmatrixID_0174	-325	+	GCATGtgt	bHLH	Os01g0915600;Os02g0564700;Os02g0705500;Os03g0231950;Os03g0728900;Os03g0802900;Os04g0350700;Os05g0103000;Os06g0193400;Os06g0275600;Os07g0193800;Os08g0487700;Os08g0524800;Os08g0536800;Os09g0417400;Os09g0474100;Os09g0501600;Os09g0510500
TdBCAT-B	TFmatrixID_0174	-295	+	GCATGtgt	bHLH	Os01g0915600;Os02g0564700;Os02g0705500;Os03g0231950;Os03g0728900;Os03g0802900;Os04g0350700;Os05g0103000;Os06g0193400;Os06g0275600;Os07g0193800;Os08g0487700;Os08g0524800;Os08g0536800;Os09g0417400;Os09g0474100;Os09g0501600;Os09g0510500
TdBCAT-A	TFmatrixID_0174	-276	+	GCATGtgt	bHLH	Os01g0915600;Os02g0564700;Os02g0705500;Os03g0231950;Os03g0728900;Os03g0802900;Os04g0350700;Os05g0103000;Os06g0193400;Os06g0275600;Os07g0193800;Os08g0487700;Os08g0524800;Os08g0536800;Os09g0417400;Os09g0474100;Os09g0501600;Os09g0510500
TdBCAT-B	TFmatrixID_0174	-261	+	GCATGtgg	bHLH	Os01g0915600;Os02g0564700;Os02g0705500;Os03g0231950;Os03g0728900;Os03g0802900;Os04g0350700;Os05g0103000;Os06g0193400;Os06g0275600;Os07g0193800;Os08g0487700;Os08g0524800;Os08g0536800;Os09g0417400;Os09g0474100;Os09g0501600;Os09g0510500
TdBCAT-A	TFmatrixID_0174	-246	+	GCATGtgt	bHLH	Os01g0915600;Os02g0564700;Os02g0705500;Os03g0231950;Os03g0728900;Os03g0802900;Os04g0350700;Os05g0103000;Os06g0193400;Os06g0275600;Os07g0193800;Os08g0487700;Os08g0524800;Os08g0536800;Os09g0417400;Os09g0474100;Os09g0501600;Os09g0510500
TdBCAT-A	TFmatrixID_0174	-225	+	GCATGtgg	bHLH	Os01g0915600;Os02g0564700;Os02g0705500;Os03g0231950;Os03g0728900;Os03g0802900;Os04g0350700;Os05g0103000;Os06g0193400;Os06g0275600;Os07g0193800;Os08g0487700;Os08g0524800;Os08g0536800;Os09g0417400;Os09g0474100;Os09g0501600;Os09g0510500
TdBCAT-B	TFmatrixID_0176	-218	+	aacACTTGc	bHLH	Os01g0900800;Os02g0564700;Os02g0603600;Os04g0489600;Os08g0506700;Os09g0487900
TdBCAT-B	TFmatrixID_0174	-217	-	acaCTTGC	bHLH	Os01g0915600;Os02g0564700;Os02g0705500;Os03g0231950;Os03g0728900;Os03g0802900;Os04g0350700;Os05g0103000;Os06g0193400;Os06g0275600;Os07g0193800;Os08g0487700;Os08g0524800;Os08g0536800;Os09g0417400;Os09g0474100;Os09g0501600;Os09g0510500
TdBCAT-B	TFmatrixID_0174	-153	-	gctGGTGC	bHLH	Os01g0915600;Os02g0564700;Os02g0705500;Os03g0231950;Os03g0728900;Os03g0802900;Os04g0350700;Os05g0103000;Os06g0193400;Os06g0275600;Os07g0193800;Os08g0487700;Os08g0524800;Os08g0536800;Os09g0417400;Os09g0474100;Os09g0501600;Os09g0510500
TdBCAT-B	TFmatrixID_0174	-116	-	gctCCTGC	bHLH	Os01g0915600;Os02g0564700;Os02g0705500;Os03g0231950;Os03g0728900;Os03g0802900;Os04g0350700;Os05g0103000;Os06g0193400;Os06g0275600;Os07g0193800;Os08g0487700;Os08g0524800;Os08g0536800;Os09g0417400;Os09g0474100;Os09g0501600;Os09g0510500
TdBCAT-B	TFmatrixID_0174	-20	+	GCCCGggc	bHLH	Os01g0915600;Os02g0564700;Os02g0705500;Os03g0231950;Os03g0728900;Os03g0802900;Os04g0350700;Os05g0103000;Os06g0193400;Os06g0275600;Os07g0193800;Os08g0487700;Os08g0524800;Os08g0536800;Os09g0417400;Os09g0474100;Os09g0501600;Os09g0510500
TdBCAT-B	TFmatrixID_0174	-20	-	gccCGGGC	bHLH	Os01g0915600;Os02g0564700;Os02g0705500;Os03g0231950;Os03g0728900;Os03g0802900;Os04g0350700;Os05g0103000;Os06g0193400;Os06g0275600;Os07g0193800;Os08g0487700;Os08g0524800;Os08g0536800;Os09g0417400;Os09g0474100;Os09g0501600;Os09g0510500
TdBCAT-A	TFmatrixID_0172	-13	-	cgtACGTGcg	bHLH	Os02g0726700;Os08g0490000;Os09g0475400
TdBCAT-B	TFmatrixID_0172	-13	-	cgtACGTGcg	bHLH	Os02g0726700;Os08g0490000;Os09g0475400
TdBCAT-A	TFmatrixID_0174	-12	+	GTACGtgc	bHLH	Os01g0915600;Os02g0564700;Os02g0705500;Os03g0231950;Os03g0728900;Os03g0802900;Os04g0350700;Os05g0103000;Os06g0193400;Os06g0275600;Os07g0193800;Os08g0487700;Os08g0524800;Os08g0536800;Os09g0417400;Os09g0474100;Os09g0501600;Os09g0510500
TdBCAT-A	TFmatrixID_0174	-12	-	gtaCGTGC	bHLH	Os01g0915600;Os02g0564700;Os02g0705500;Os03g0231950;Os03g0728900;Os03g0802900;Os04g0350700;Os05g0103000;Os06g0193400;Os06g0275600;Os07g0193800;Os08g0487700;Os08g0524800;Os08g0536800;Os09g0417400;Os09g0474100;Os09g0501600;Os09g0510500
TdBCAT-B	TFmatrixID_0174	-12	+	GTACGtgc	bHLH	Os01g0915600;Os02g0564700;Os02g0705500;Os03g0231950;Os03g0728900;Os03g0802900;Os04g0350700;Os05g0103000;Os06g0193400;Os06g0275600;Os07g0193800;Os08g0487700;Os08g0524800;Os08g0536800;Os09g0417400;Os09g0474100;Os09g0501600;Os09g0510500
TdBCAT-B	TFmatrixID_0174	-12	-	gtaCGTGC	bHLH	Os01g0915600;Os02g0564700;Os02g0705500;Os03g0231950;Os03g0728900;Os03g0802900;Os04g0350700;Os05g0103000;Os06g0193400;Os06g0275600;Os07g0193800;Os08g0487700;Os08g0524800;Os08g0536800;Os09g0417400;Os09g0474100;Os09g0501600;Os09g0510500
TdBCAT-A	TFmatrixID_0174	-8	-	gtgCGTGC	bHLH	Os01g0915600;Os02g0564700;Os02g0705500;Os03g0231950;Os03g0728900;Os03g0802900;Os04g0350700;Os05g0103000;Os06g0193400;Os06g0275600;Os07g0193800;Os08g0487700;Os08g0524800;Os08g0536800;Os09g0417400;Os09g0474100;Os09g0501600;Os09g0510500
TdBCAT-B	TFmatrixID_0174	-8	-	gtgCGTGC	bHLH	Os01g0915600;Os02g0564700;Os02g0705500;Os03g0231950;Os03g0728900;Os03g0802900;Os04g0350700;Os05g0103000;Os06g0193400;Os06g0275600;Os07g0193800;Os08g0487700;Os08g0524800;Os08g0536800;Os09g0417400;Os09g0474100;Os09g0501600;Os09g0510500
TdBCAT-B	TFmatrixID_0533	-814	-	cggTGACGaca	bZIP	Os01g0279900;Os01g0808100;Os01g0859500;Os02g0194900;Os03g0318600;Os04g0637000;Os05g0443850;Os05g0492000;Os06g0265400;Os06g0614100;Os07g0687700;Os08g0176900;Os09g0280500;Os09g0489500;Os11g0152700;Os12g0152900
TdBCAT-B	TFmatrixID_0185	-813	-	ggTGACGaca	bZIP	Os01g0279900;Os01g0808100;Os01g0859500;Os02g0194900;Os03g0318600;Os04g0637000;Os05g0443850;Os05g0492000;Os06g0265400;Os06g0614100;Os07g0687700;Os08g0176900;Os09g0280500;Os09g0489500;Os11g0152700;Os12g0152900
TdBCAT-B	TFmatrixID_0197	-813	-	ggTGACGaca	bZIP	Os01g0279900;Os01g0808100;Os01g0859500;Os02g0194900;Os03g0318600;Os04g0637000;Os05g0443850;Os05g0492000;Os06g0265400;Os06g0614100;Os07g0687700;Os08g0176900;Os09g0280500;Os09g0489500;Os11g0152700;Os12g0152900
TdBCAT-B	TFmatrixID_0199	-813	-	ggTGACGaca	bZIP	Os01g0279900;Os01g0808100;Os01g0859500;Os02g0194900;Os03g0318600;Os04g0637000;Os05g0443850;Os05g0492000;Os06g0265400;Os06g0614100;Os07g0687700;Os08g0176900;Os09g0280500;Os09g0489500;Os11g0152700;Os12g0152900
TdBCAT-B	TFmatrixID_0188	-808	+	cGACAGcgcg	bZIP	Os03g0127500;Os03g0336200
TdBCAT-B	TFmatrixID_0193	-673	+	AGACGtat	bZIP	Os02g0766700;Os05g0489700;Os06g0211200;Os09g0456200
TdBCAT-B	TFmatrixID_0193	-673	-	agaCGTAT	bZIP	Os02g0766700;Os05g0489700;Os06g0211200;Os09g0456200
TdBCAT-B	TFmatrixID_0193	-614	+	ACACGcgg	bZIP	Os02g0766700;Os05g0489700;Os06g0211200;Os09g0456200
TdBCAT-A	TFmatrixID_0193	-562	+	ACACGcgg	bZIP	Os02g0766700;Os05g0489700;Os06g0211200;Os09g0456200
TdBCAT-B	TFmatrixID_0193	-507	+	CCACGggt	bZIP	Os02g0766700;Os05g0489700;Os06g0211200;Os09g0456200
TdBCAT-B	TFmatrixID_0193	-507	-	ccaCGGGT	bZIP	Os02g0766700;Os05g0489700;Os06g0211200;Os09g0456200
TdBCAT-A	TFmatrixID_0199	-494	+	ctcCGTCAct	bZIP	Os01g0279900;Os01g0808100;Os01g0859500;Os02g0194900;Os03g0318600;Os04g0637000;Os05g0443850;Os05g0492000;Os06g0265400;Os06g0614100;Os07g0687700;Os08g0176900;Os09g0280500;Os09g0489500;Os11g0152700;Os12g0152900
TdBCAT-A	TFmatrixID_0193	-455	+	CCACGggt	bZIP	Os02g0766700;Os05g0489700;Os06g0211200;Os09g0456200
TdBCAT-A	TFmatrixID_0193	-455	-	ccaCGGGT	bZIP	Os02g0766700;Os05g0489700;Os06g0211200;Os09g0456200
TdBCAT-A	TFmatrixID_0193	-356	+	ACAGGagt	bZIP	Os02g0766700;Os05g0489700;Os06g0211200;Os09g0456200
TdBCAT-B	TFmatrixID_0193	-325	-	gcaTGTGT	bZIP	Os02g0766700;Os05g0489700;Os06g0211200;Os09g0456200
TdBCAT-B	TFmatrixID_0193	-295	-	gcaTGTGT	bZIP	Os02g0766700;Os05g0489700;Os06g0211200;Os09g0456200
TdBCAT-A	TFmatrixID_0193	-276	-	gcaTGTGT	bZIP	Os02g0766700;Os05g0489700;Os06g0211200;Os09g0456200
TdBCAT-B	TFmatrixID_0193	-247	-	ataAGTGT	bZIP	Os02g0766700;Os05g0489700;Os06g0211200;Os09g0456200
TdBCAT-A	TFmatrixID_0193	-246	-	gcaTGTGT	bZIP	Os02g0766700;Os05g0489700;Os06g0211200;Os09g0456200
TdBCAT-B	TFmatrixID_0193	-217	+	ACACTtgc	bZIP	Os02g0766700;Os05g0489700;Os06g0211200;Os09g0456200
TdBCAT-B	TFmatrixID_0193	-93	+	AAACGtat	bZIP	Os02g0766700;Os05g0489700;Os06g0211200;Os09g0456200
TdBCAT-B	TFmatrixID_0193	-93	-	aaaCGTAT	bZIP	Os02g0766700;Os05g0489700;Os06g0211200;Os09g0456200
TdBCAT-A	TFmatrixID_0518	-806	+	ccttgacATGATgacttct	bZIP; Homeodomain; HD-ZIP	Os03g0109400;Os03g0640800;Os10g0480200;Os12g0612700
TdBCAT-A	TFmatrixID_0542	-806	+	ccttgacATGATgacttct	bZIP; Homeodomain; HD-ZIP	Os03g0109400;Os03g0640800;Os10g0480200;Os12g0612700
TdBCAT-B	TFmatrixID_0211	-245	-	aAGTGTa	C2H2	Os03g0437200;Os12g0583700
TdBCAT-B	TFmatrixID_0213	-245	-	aAGTGTa	C2H2	Os03g0437100;Os03g0437200;Os12g0583700
TdBCAT-B	TFmatrixID_0211	-218	+	aACACTt	C2H2	Os03g0437200;Os12g0583700
TdBCAT-B	TFmatrixID_0213	-218	+	aACACTt	C2H2	Os03g0437100;Os03g0437200;Os12g0583700
TdBCAT-A	TFmatrixID_0211	-136	+	aACACTt	C2H2	Os03g0437200;Os12g0583700
TdBCAT-A	TFmatrixID_0213	-136	+	aACACTt	C2H2	Os03g0437100;Os03g0437200;Os12g0583700
TdBCAT-B	TFmatrixID_0220	-615	-	tacACGCGg	CG-1	Os03g0191000;Os07g0623100;Os10g0375600
TdBCAT-B	TFmatrixID_0221	-612	-	ACGCGgcag	CG-1	Os03g0191000;Os07g0623100;Os10g0375600
TdBCAT-A	TFmatrixID_0220	-563	-	tacACGCGg	CG-1	Os03g0191000;Os07g0623100;Os10g0375600
TdBCAT-A	TFmatrixID_0221	-560	-	ACGCGgcag	CG-1	Os03g0191000;Os07g0623100;Os10g0375600
TdBCAT-B	TFmatrixID_0252	-803	+	gCGCGCcttc	E2F	Os02g0537500
TdBCAT-A	TFmatrixID_0252	-729	+	gCGCGCcttc	E2F	Os02g0537500
TdBCAT-B	TFmatrixID_0252	-561	-	ccagGCGCGg	E2F	Os02g0537500
TdBCAT-A	TFmatrixID_0252	-509	-	ccagGCGCGg	E2F	Os02g0537500
TdBCAT-A	TFmatrixID_0255	-671	+	cTGTATctt	EIN3	Os03g0324200;Os03g0324300;Os07g0685700;Os08g0508700
TdBCAT-B	TFmatrixID_0256	-329	+	taATGCAtgt	EIN3	Os03g0324200;Os03g0324300;Os07g0685700;Os08g0508700
TdBCAT-B	TFmatrixID_0256	-329	-	taaTGCATgt	EIN3	Os03g0324200;Os03g0324300;Os07g0685700;Os08g0508700
TdBCAT-B	TFmatrixID_0256	-299	+	caATGCAtgt	EIN3	Os03g0324200;Os03g0324300;Os07g0685700;Os08g0508700
TdBCAT-B	TFmatrixID_0256	-299	-	caaTGCATgt	EIN3	Os03g0324200;Os03g0324300;Os07g0685700;Os08g0508700
TdBCAT-A	TFmatrixID_0256	-280	+	taATGCAtgt	EIN3	Os03g0324200;Os03g0324300;Os07g0685700;Os08g0508700
TdBCAT-A	TFmatrixID_0256	-280	-	taaTGCATgt	EIN3	Os03g0324200;Os03g0324300;Os07g0685700;Os08g0508700
TdBCAT-B	TFmatrixID_0256	-265	+	caATGCAtgt	EIN3	Os03g0324200;Os03g0324300;Os07g0685700;Os08g0508700
TdBCAT-B	TFmatrixID_0256	-265	-	caaTGCATgt	EIN3	Os03g0324200;Os03g0324300;Os07g0685700;Os08g0508700
TdBCAT-A	TFmatrixID_0256	-250	+	caATGCAtgt	EIN3	Os03g0324200;Os03g0324300;Os07g0685700;Os08g0508700
TdBCAT-A	TFmatrixID_0256	-250	-	caaTGCATgt	EIN3	Os03g0324200;Os03g0324300;Os07g0685700;Os08g0508700
TdBCAT-B	TFmatrixID_0255	-239	-	atgATACAg	EIN3	Os03g0324200;Os03g0324300;Os07g0685700;Os08g0508700
TdBCAT-A	TFmatrixID_0256	-229	+	caATGCAtgt	EIN3	Os03g0324200;Os03g0324300;Os07g0685700;Os08g0508700
TdBCAT-A	TFmatrixID_0256	-229	-	caaTGCATgt	EIN3	Os03g0324200;Os03g0324300;Os07g0685700;Os08g0508700
TdBCAT-A	TFmatrixID_0255	-203	-	cggATACAg	EIN3	Os03g0324200;Os03g0324300;Os07g0685700;Os08g0508700
TdBCAT-A	TF_motif_seq_0356	-888	-	tgCGGCT	ERF	Os02g0782700
TdBCAT-B	TF_motif_seq_0356	-556	-	cgCGGCT	ERF	Os02g0782700
TdBCAT-A	TF_motif_seq_0356	-504	-	cgCGGCT	ERF	Os02g0782700
TdBCAT-B	TF_motif_seq_0356	-120	-	agCGGCT	ERF	Os02g0782700
TdBCAT-A	TFmatrixID_0264	-964	-	gcgGATCTcg	GATA	Os01g0745700;Os02g0645600;Os02g0806300;Os03g0145200;Os05g0520300;Os10g0557600
TdBCAT-A	TFmatrixID_0267	-964	-	gcgGATCTcg	GATA	Os01g0745700;Os02g0645600;Os02g0806300;Os03g0145200;Os05g0520300;Os10g0557600
TdBCAT-A	TFmatrixID_0270	-929	-	ggtgGATCTg	GATA	Os01g0745700;Os02g0645600;Os02g0806300;Os03g0145200;Os05g0520300;Os10g0557600;Os11g0187200
TdBCAT-A	TFmatrixID_0264	-928	-	gtgGATCTgc	GATA	Os01g0745700;Os02g0645600;Os02g0806300;Os03g0145200;Os05g0520300;Os10g0557600
TdBCAT-A	TFmatrixID_0267	-928	-	gtgGATCTgc	GATA	Os01g0745700;Os02g0645600;Os02g0806300;Os03g0145200;Os05g0520300;Os10g0557600
TdBCAT-A	TFmatrixID_0271	-928	+	gtgGATCTgc	GATA	Os01g0745700;Os02g0645600;Os02g0806300;Os03g0145200;Os05g0520300;Os10g0557600;Os11g0187200
TdBCAT-A	TFmatrixID_0266	-927	+	tgGATCTgc	GATA	Os01g0745700;Os02g0645600;Os02g0806300;Os03g0145200;Os05g0520300;Os10g0557600
TdBCAT-A	TFmatrixID_0264	-918	+	tcAGATCcgg	GATA	Os01g0745700;Os02g0645600;Os02g0806300;Os03g0145200;Os05g0520300;Os10g0557600
TdBCAT-A	TFmatrixID_0266	-918	-	tcAGATCcg	GATA	Os01g0745700;Os02g0645600;Os02g0806300;Os03g0145200;Os05g0520300;Os10g0557600
TdBCAT-A	TFmatrixID_0267	-918	+	tcAGATCcgg	GATA	Os01g0745700;Os02g0645600;Os02g0806300;Os03g0145200;Os05g0520300;Os10g0557600
TdBCAT-A	TFmatrixID_0271	-918	-	tcAGATCcgg	GATA	Os01g0745700;Os02g0645600;Os02g0806300;Os03g0145200;Os05g0520300;Os10g0557600;Os11g0187200
TdBCAT-A	TFmatrixID_0270	-917	+	cAGATCcggt	GATA	Os01g0745700;Os02g0645600;Os02g0806300;Os03g0145200;Os05g0520300;Os10g0557600;Os11g0187200
TdBCAT-A	TFmatrixID_0265	-868	-	ttccGATCTa	GATA	Os01g0745700;Os02g0645600;Os02g0806300;Os03g0145200;Os05g0520300;Os10g0557600
TdBCAT-A	TFmatrixID_0270	-868	-	ttccGATCTa	GATA	Os01g0745700;Os02g0645600;Os02g0806300;Os03g0145200;Os05g0520300;Os10g0557600;Os11g0187200
TdBCAT-A	TFmatrixID_0264	-867	-	tccGATCTat	GATA	Os01g0745700;Os02g0645600;Os02g0806300;Os03g0145200;Os05g0520300;Os10g0557600
TdBCAT-A	TFmatrixID_0267	-867	-	tccGATCTat	GATA	Os01g0745700;Os02g0645600;Os02g0806300;Os03g0145200;Os05g0520300;Os10g0557600
TdBCAT-A	TFmatrixID_0271	-867	+	tccGATCTat	GATA	Os01g0745700;Os02g0645600;Os02g0806300;Os03g0145200;Os05g0520300;Os10g0557600;Os11g0187200
TdBCAT-A	TFmatrixID_0259	-866	+	ccGATCTa	GATA	Os01g0745700;Os02g0645600;Os02g0806300;Os03g0145200;Os05g0520300;Os10g0557600
TdBCAT-A	TFmatrixID_0266	-866	+	ccGATCTat	GATA	Os01g0745700;Os02g0645600;Os02g0806300;Os03g0145200;Os05g0520300;Os10g0557600
TdBCAT-A	TFmatrixID_0268	-866	+	cCGATCtata	GATA	Os04g0544500
TdBCAT-A	TFmatrixID_0272	-866	+	cCGATCtat	GATA	Os04g0544500
TdBCAT-A	TFmatrixID_0264	-190	+	gcAGATCcaa	GATA	Os01g0745700;Os02g0645600;Os02g0806300;Os03g0145200;Os05g0520300;Os10g0557600
TdBCAT-A	TFmatrixID_0266	-190	-	gcAGATCca	GATA	Os01g0745700;Os02g0645600;Os02g0806300;Os03g0145200;Os05g0520300;Os10g0557600
TdBCAT-A	TFmatrixID_0267	-190	+	gcAGATCcaa	GATA	Os01g0745700;Os02g0645600;Os02g0806300;Os03g0145200;Os05g0520300;Os10g0557600
TdBCAT-A	TFmatrixID_0271	-190	-	gcAGATCcaa	GATA	Os01g0745700;Os02g0645600;Os02g0806300;Os03g0145200;Os05g0520300;Os10g0557600;Os11g0187200
TdBCAT-A	TFmatrixID_0265	-189	+	cAGATCcaac	GATA	Os01g0745700;Os02g0645600;Os02g0806300;Os03g0145200;Os05g0520300;Os10g0557600
TdBCAT-A	TFmatrixID_0270	-189	+	cAGATCcaac	GATA	Os01g0745700;Os02g0645600;Os02g0806300;Os03g0145200;Os05g0520300;Os10g0557600;Os11g0187200
TdBCAT-B	TFmatrixID_0268	-45	-	tggcGATCGa	GATA	Os04g0544500
TdBCAT-B	TFmatrixID_0272	-44	-	ggcGATCGa	GATA	Os04g0544500
TdBCAT-B	TFmatrixID_0268	-43	+	gCGATCgatc	GATA	Os04g0544500
TdBCAT-B	TFmatrixID_0272	-43	+	gCGATCgat	GATA	Os04g0544500
TdBCAT-B	TFmatrixID_0265	-41	-	gatcGATCTa	GATA	Os01g0745700;Os02g0645600;Os02g0806300;Os03g0145200;Os05g0520300;Os10g0557600
TdBCAT-B	TFmatrixID_0270	-41	-	gatcGATCTa	GATA	Os01g0745700;Os02g0645600;Os02g0806300;Os03g0145200;Os05g0520300;Os10g0557600;Os11g0187200
TdBCAT-B	TFmatrixID_0264	-40	-	atcGATCTag	GATA	Os01g0745700;Os02g0645600;Os02g0806300;Os03g0145200;Os05g0520300;Os10g0557600
TdBCAT-B	TFmatrixID_0267	-40	-	atcGATCTag	GATA	Os01g0745700;Os02g0645600;Os02g0806300;Os03g0145200;Os05g0520300;Os10g0557600
TdBCAT-B	TFmatrixID_0271	-40	+	atcGATCTag	GATA	Os01g0745700;Os02g0645600;Os02g0806300;Os03g0145200;Os05g0520300;Os10g0557600;Os11g0187200
TdBCAT-B	TFmatrixID_0266	-39	+	tcGATCTag	GATA	Os01g0745700;Os02g0645600;Os02g0806300;Os03g0145200;Os05g0520300;Os10g0557600
TdBCAT-B	TFmatrixID_0268	-39	+	tCGATCtagc	GATA	Os04g0544500
TdBCAT-B	TFmatrixID_0272	-39	+	tCGATCtag	GATA	Os04g0544500
TdBCAT-A	TFmatrixID_0268	-26	-	tggcGATCGc	GATA	Os04g0544500
TdBCAT-A	TFmatrixID_0272	-25	-	ggcGATCGc	GATA	Os04g0544500
TdBCAT-A	TFmatrixID_0268	-24	+	gCGATCgcgg	GATA	Os04g0544500
TdBCAT-A	TFmatrixID_0272	-24	+	gCGATCgcg	GATA	Os04g0544500
TdBCAT-B	TFmatrixID_0279	-725	-	tgTTCATt	Homeodomain	Os01g0672201;Os05g0562400
TdBCAT-A	TFmatrixID_0279	-649	-	tgTTCATt	Homeodomain	Os01g0672201;Os05g0562400
TdBCAT-B	TFmatrixID_0279	-177	+	tATGAAcg	Homeodomain	Os01g0672201;Os05g0562400
TdBCAT-B	TF_motif_seq_0246	-926	+	TGACC	Homeodomain; TALE	Os03g0727000
TdBCAT-A	TF_motif_seq_0246	-903	-	GGTCA	Homeodomain; TALE	Os03g0727000
TdBCAT-B	TF_motif_seq_0246	-876	+	TGACA	Homeodomain; TALE	Os03g0727000
TdBCAT-B	TFmatrixID_0300	-813	+	ggTGACGaca	Homeodomain; TALE	Os01g0302500;Os03g0673000;Os03g0727000;Os05g0129700;Os07g0129700
TdBCAT-B	TF_motif_seq_0246	-811	+	TGACG	Homeodomain; TALE	Os03g0727000
TdBCAT-A	TFmatrixID_0294	-805	+	ctTGACAt	Homeodomain; TALE	Os03g0123500
TdBCAT-A	TF_motif_seq_0246	-803	+	TGACA	Homeodomain; TALE	Os03g0727000
TdBCAT-A	TF_motif_seq_0246	-795	+	TGACT	Homeodomain; TALE	Os03g0727000
TdBCAT-B	TF_motif_seq_0246	-750	+	TGACA	Homeodomain; TALE	Os03g0727000
TdBCAT-A	TFmatrixID_0293	-739	+	ggTGACAgta	Homeodomain; TALE	Os02g0182800;Os06g0646600;Os08g0292900
TdBCAT-A	TF_motif_seq_0246	-737	+	TGACA	Homeodomain; TALE	Os03g0727000
TdBCAT-A	TF_motif_seq_0246	-674	+	TGACT	Homeodomain; TALE	Os03g0727000
TdBCAT-B	TFmatrixID_0293	-546	-	ctcTGTCAct	Homeodomain; TALE	Os02g0182800;Os06g0646600;Os08g0292900
TdBCAT-B	TF_motif_seq_0246	-543	-	TGTCA	Homeodomain; TALE	Os03g0727000
TdBCAT-B	TF_motif_seq_0246	-502	-	GGTCA	Homeodomain; TALE	Os03g0727000
TdBCAT-A	TF_motif_seq_0246	-491	-	CGTCA	Homeodomain; TALE	Os03g0727000
TdBCAT-A	TF_motif_seq_0246	-450	-	GGTCA	Homeodomain; TALE	Os03g0727000
TdBCAT-B	TF_motif_seq_0246	-385	-	TGTCA	Homeodomain; TALE	Os03g0727000
TdBCAT-B	TF_motif_seq_0246	-362	-	TGTCA	Homeodomain; TALE	Os03g0727000
TdBCAT-A	TF_motif_seq_0246	-327	-	TGTCA	Homeodomain; TALE	Os03g0727000
TdBCAT-B	TF_motif_seq_0422	-338	-	aacGCATG	LEA_5	U22102
TdBCAT-B	TF_motif_seq_0422	-328	-	aatGCATG	LEA_5	U22102
TdBCAT-B	TF_motif_seq_0422	-298	-	aatGCATG	LEA_5	U22102
TdBCAT-A	TF_motif_seq_0422	-279	-	aatGCATG	LEA_5	U22102
TdBCAT-B	TF_motif_seq_0422	-264	-	aatGCATG	LEA_5	U22102
TdBCAT-A	TF_motif_seq_0422	-249	-	aatGCATG	LEA_5	U22102
TdBCAT-A	TF_motif_seq_0422	-228	-	aatGCATG	LEA_5	U22102
TdBCAT-A	TFmatrixID_0310	-702	+	gtaTTTACcg	MADF	Os02g0104500;Os04g0541100;Os10g0516500
TdBCAT-A	TFmatrixID_0311	-702	+	gtaTTTACcg	MADF	Os02g0104500;Os04g0541100;Os10g0516500
TdBCAT-A	TFmatrixID_0336	-694	+	cgcTAGGTggt	Myb/SANT	Os05g0429900;LOC_Os08g43550;Os09g0538400;Os11g0180900;Os12g0175400
TdBCAT-A	TFmatrixID_0348	-671	+	ctgtATCTTt	Myb/SANT	Os03g0224200
TdBCAT-B	TFmatrixID_0323	-372	+	caaATATCtt	Myb/SANT	Os06g0728700
TdBCAT-B	TFmatrixID_0334	-372	+	caaATATCt	Myb/SANT	Os06g0728700
TdBCAT-B	TFmatrixID_0320	-371	-	aaATATCtt	Myb/SANT	Os02g0680700;Os06g0105800;Os06g0669700
TdBCAT-B	TFmatrixID_0369	-371	+	aaATATCtt	Myb/SANT	Os08g0157600
TdBCAT-B	TFmatrixID_0579	-324	-	catgTGTTAattcgc	Myb/SANT	Os04g0348300
TdBCAT-B	TFmatrixID_0563	-323	-	atgtGTTAAttc	Myb/SANT	Os04g0348300
TdBCAT-A	TFmatrixID_0323	-313	+	caaATATCtt	Myb/SANT	Os06g0728700
TdBCAT-A	TFmatrixID_0334	-313	+	caaATATCt	Myb/SANT	Os06g0728700
TdBCAT-A	TFmatrixID_0320	-312	-	aaATATCtt	Myb/SANT	Os02g0680700;Os06g0105800;Os06g0669700
TdBCAT-A	TFmatrixID_0369	-312	+	aaATATCtt	Myb/SANT	Os08g0157600
TdBCAT-A	TFmatrixID_0579	-275	-	catgTGTTAgctcgc	Myb/SANT	Os04g0348300
TdBCAT-B	TFmatrixID_0336	-127	-	agtACCTAgcg	Myb/SANT	Os05g0429900;LOC_Os08g43550;Os09g0538400;Os11g0180900;Os12g0175400
TdBCAT-B	TFmatrixID_0524	-113	+	cctGCTGAgca	Myb/SANT	Os04g0348300
TdBCAT-B	TFmatrixID_0547	-113	+	cctGCTGAgca	Myb/SANT	Os04g0348300
TdBCAT-B	TFmatrixID_0357	-709	+	atAATATttt	Myb/SANT; G2-like	Os02g0696900;Os03g0766500;Os08g0160300;Os08g0426866;Os09g0395300
TdBCAT-B	TFmatrixID_0357	-709	-	ataATATTtt	Myb/SANT; G2-like	Os02g0696900;Os03g0766500;Os08g0160300;Os08g0426866;Os09g0395300
TdBCAT-B	TFmatrixID_0357	-683	+	atAATATtat	Myb/SANT; G2-like	Os02g0696900;Os03g0766500;Os08g0160300;Os08g0426866;Os09g0395300
TdBCAT-B	TFmatrixID_0357	-683	-	ataATATTat	Myb/SANT; G2-like	Os02g0696900;Os03g0766500;Os08g0160300;Os08g0426866;Os09g0395300
TdBCAT-B	TF_motif_seq_0376	-322	-	tgTGTTA	Myb/SANT; MYB	Os01g0812000
TdBCAT-A	TF_motif_seq_0376	-273	-	tgTGTTA	Myb/SANT; MYB	Os01g0812000
TdBCAT-A	TFmatrixID_0382	-677	-	atTTGACtg	NAC; NAM	Os01g0104200;Os01g0816100;Os03g0327800;Os05g0421600;Os07g0566500;Os07g0683200;Os11g0126900;Os11g0184900;Os12g0123700
TdBCAT-B	TFmatrixID_0382	-503	+	ggGTCAAta	NAC; NAM	Os01g0104200;Os01g0816100;Os03g0327800;Os05g0421600;Os07g0566500;Os07g0683200;Os11g0126900;Os11g0184900;Os12g0123700
TdBCAT-A	TFmatrixID_0382	-451	+	ggGTCAAtt	NAC; NAM	Os01g0104200;Os01g0816100;Os03g0327800;Os05g0421600;Os07g0566500;Os07g0683200;Os11g0126900;Os11g0184900;Os12g0123700
TdBCAT-B	TF_motif_seq_0257	-975	+	CCAAT	NF-YB	Os01g0834400;Os02g0725900;Os05g0463800;Os05g0573500
TdBCAT-B	TF_motif_seq_0257	-964	-	ATGGG	NF-YB	Os01g0834400;Os02g0725900;Os05g0463800;Os05g0573500
TdBCAT-A	TF_motif_seq_0257	-950	-	ATTCG	NF-YB	Os01g0834400;Os02g0725900;Os05g0463800;Os05g0573500
TdBCAT-A	TF_motif_seq_0257	-938	-	ATTGT	NF-YB	Os01g0834400;Os02g0725900;Os05g0463800;Os05g0573500
TdBCAT-B	TF_motif_seq_0257	-935	+	CTAAT	NF-YB	Os01g0834400;Os02g0725900;Os05g0463800;Os05g0573500
TdBCAT-B	TF_motif_seq_0257	-933	-	AATGG	NF-YB	Os01g0834400;Os02g0725900;Os05g0463800;Os05g0573500
TdBCAT-B	TF_motif_seq_0257	-932	-	ATGGG	NF-YB	Os01g0834400;Os02g0725900;Os05g0463800;Os05g0573500
TdBCAT-B	TF_motif_seq_0257	-888	+	CCTAT	NF-YB	Os01g0834400;Os02g0725900;Os05g0463800;Os05g0573500
TdBCAT-A	TF_motif_seq_0257	-877	-	GTTGG	NF-YB	Os01g0834400;Os02g0725900;Os05g0463800;Os05g0573500
TdBCAT-A	TF_motif_seq_0257	-866	+	CCGAT	NF-YB	Os01g0834400;Os02g0725900;Os05g0463800;Os05g0573500
TdBCAT-B	TF_motif_seq_0257	-848	+	ACAAT	NF-YB	Os01g0834400;Os02g0725900;Os05g0463800;Os05g0573500
TdBCAT-B	TF_motif_seq_0257	-828	+	CCAAC	NF-YB	Os01g0834400;Os02g0725900;Os05g0463800;Os05g0573500
TdBCAT-A	TF_motif_seq_0257	-815	+	CCTAT	NF-YB	Os01g0834400;Os02g0725900;Os05g0463800;Os05g0573500
TdBCAT-A	TF_motif_seq_0257	-812	-	ATAGG	NF-YB	Os01g0834400;Os02g0725900;Os05g0463800;Os05g0573500
TdBCAT-B	TF_motif_seq_0257	-785	+	TCAAT	NF-YB	Os01g0834400;Os02g0725900;Os05g0463800;Os05g0573500
TdBCAT-B	TF_motif_seq_0257	-782	-	ATTGT	NF-YB	Os01g0834400;Os02g0725900;Os05g0463800;Os05g0573500
TdBCAT-B	TF_motif_seq_0257	-773	-	ATTCG	NF-YB	Os01g0834400;Os02g0725900;Os05g0463800;Os05g0573500
TdBCAT-B	TF_motif_seq_0257	-753	-	ATTTG	NF-YB	Os01g0834400;Os02g0725900;Os05g0463800;Os05g0573500
TdBCAT-B	TF_motif_seq_0257	-720	-	ATTGT	NF-YB	Os01g0834400;Os02g0725900;Os05g0463800;Os05g0573500
TdBCAT-A	TF_motif_seq_0257	-711	+	TCAAT	NF-YB	Os01g0834400;Os02g0725900;Os05g0463800;Os05g0573500
TdBCAT-A	TF_motif_seq_0257	-677	-	ATTTG	NF-YB	Os01g0834400;Os02g0725900;Os05g0463800;Os05g0573500
TdBCAT-B	TF_motif_seq_0257	-663	-	ATTGG	NF-YB	Os01g0834400;Os02g0725900;Os05g0463800;Os05g0573500
TdBCAT-B	TF_motif_seq_0257	-652	-	TTTGG	NF-YB	Os01g0834400;Os02g0725900;Os05g0463800;Os05g0573500
TdBCAT-B	TF_motif_seq_0257	-642	-	ATTAG	NF-YB	Os01g0834400;Os02g0725900;Os05g0463800;Os05g0573500
TdBCAT-A	TF_motif_seq_0257	-641	+	CTAAT	NF-YB	Os01g0834400;Os02g0725900;Os05g0463800;Os05g0573500
TdBCAT-A	TF_motif_seq_0257	-613	-	AATGG	NF-YB	Os01g0834400;Os02g0725900;Os05g0463800;Os05g0573500
TdBCAT-A	TF_motif_seq_0257	-590	-	ATTAG	NF-YB	Os01g0834400;Os02g0725900;Os05g0463800;Os05g0573500
TdBCAT-B	TF_motif_seq_0257	-524	+	CCACT	NF-YB	Os01g0834400;Os02g0725900;Os05g0463800;Os05g0573500
TdBCAT-B	TF_motif_seq_0257	-500	+	TCAAT	NF-YB	Os01g0834400;Os02g0725900;Os05g0463800;Os05g0573500
TdBCAT-B	TF_motif_seq_0257	-485	+	CCCAT	NF-YB	Os01g0834400;Os02g0725900;Os05g0463800;Os05g0573500
TdBCAT-A	TF_motif_seq_0257	-472	+	CCACT	NF-YB	Os01g0834400;Os02g0725900;Os05g0463800;Os05g0573500
TdBCAT-A	TF_motif_seq_0257	-448	+	TCAAT	NF-YB	Os01g0834400;Os02g0725900;Os05g0463800;Os05g0573500
TdBCAT-A	TF_motif_seq_0257	-445	-	ATTGC	NF-YB	Os01g0834400;Os02g0725900;Os05g0463800;Os05g0573500
TdBCAT-B	TF_motif_seq_0257	-429	+	CCTAT	NF-YB	Os01g0834400;Os02g0725900;Os05g0463800;Os05g0573500
TdBCAT-B	TF_motif_seq_0257	-421	-	TTTGG	NF-YB	Os01g0834400;Os02g0725900;Os05g0463800;Os05g0573500
TdBCAT-B	TF_motif_seq_0257	-377	-	ATTGG	NF-YB	Os01g0834400;Os02g0725900;Os05g0463800;Os05g0573500
TdBCAT-B	TF_motif_seq_0257	-372	+	CAAAT	NF-YB	Os01g0834400;Os02g0725900;Os05g0463800;Os05g0573500
TdBCAT-B	TF_motif_seq_0257	-354	-	ATTGC	NF-YB	Os01g0834400;Os02g0725900;Os05g0463800;Os05g0573500
TdBCAT-B	TF_motif_seq_0257	-349	+	CGAAT	NF-YB	Os01g0834400;Os02g0725900;Os05g0463800;Os05g0573500
TdBCAT-B	TF_motif_seq_0257	-330	+	CTAAT	NF-YB	Os01g0834400;Os02g0725900;Os05g0463800;Os05g0573500
TdBCAT-B	TF_motif_seq_0257	-315	-	ATTCG	NF-YB	Os01g0834400;Os02g0725900;Os05g0463800;Os05g0573500
TdBCAT-A	TF_motif_seq_0257	-314	+	CCAAA	NF-YB	Os01g0834400;Os02g0725900;Os05g0463800;Os05g0573500
TdBCAT-A	TF_motif_seq_0257	-313	+	CAAAT	NF-YB	Os01g0834400;Os02g0725900;Os05g0463800;Os05g0573500
TdBCAT-A	TF_motif_seq_0257	-301	+	CCAAA	NF-YB	Os01g0834400;Os02g0725900;Os05g0463800;Os05g0573500
TdBCAT-B	TF_motif_seq_0257	-300	+	CCAAT	NF-YB	Os01g0834400;Os02g0725900;Os05g0463800;Os05g0573500
TdBCAT-A	TF_motif_seq_0257	-281	+	CTAAT	NF-YB	Os01g0834400;Os02g0725900;Os05g0463800;Os05g0573500
TdBCAT-B	TF_motif_seq_0257	-266	+	CCAAT	NF-YB	Os01g0834400;Os02g0725900;Os05g0463800;Os05g0573500
TdBCAT-A	TF_motif_seq_0257	-251	+	CCAAT	NF-YB	Os01g0834400;Os02g0725900;Os05g0463800;Os05g0573500
TdBCAT-A	TF_motif_seq_0257	-230	+	CCAAT	NF-YB	Os01g0834400;Os02g0725900;Os05g0463800;Os05g0573500
TdBCAT-B	TF_motif_seq_0257	-225	+	CAAAT	NF-YB	Os01g0834400;Os02g0725900;Os05g0463800;Os05g0573500
TdBCAT-B	TF_motif_seq_0257	-210	+	CCAAA	NF-YB	Os01g0834400;Os02g0725900;Os05g0463800;Os05g0573500
TdBCAT-B	TF_motif_seq_0257	-209	+	CAAAT	NF-YB	Os01g0834400;Os02g0725900;Os05g0463800;Os05g0573500
TdBCAT-B	TF_motif_seq_0257	-195	+	CCTAT	NF-YB	Os01g0834400;Os02g0725900;Os05g0463800;Os05g0573500
TdBCAT-A	TF_motif_seq_0257	-184	+	CCAAC	NF-YB	Os01g0834400;Os02g0725900;Os05g0463800;Os05g0573500
TdBCAT-A	TF_motif_seq_0257	-173	+	CCAAA	NF-YB	Os01g0834400;Os02g0725900;Os05g0463800;Os05g0573500
TdBCAT-A	TF_motif_seq_0257	-172	+	CAAAT	NF-YB	Os01g0834400;Os02g0725900;Os05g0463800;Os05g0573500
TdBCAT-B	TF_motif_seq_0257	-165	+	CCATT	NF-YB	Os01g0834400;Os02g0725900;Os05g0463800;Os05g0573500
TdBCAT-A	TF_motif_seq_0257	-158	+	CCTAT	NF-YB	Os01g0834400;Os02g0725900;Os05g0463800;Os05g0573500
TdBCAT-A	TF_motif_seq_0257	-127	+	CCATT	NF-YB	Os01g0834400;Os02g0725900;Os05g0463800;Os05g0573500
TdBCAT-A	TF_motif_seq_0257	-115	-	ACTGG	NF-YB	Os01g0834400;Os02g0725900;Os05g0463800;Os05g0573500
TdBCAT-A	TF_motif_seq_0257	-109	-	ATAGG	NF-YB	Os01g0834400;Os02g0725900;Os05g0463800;Os05g0573500
TdBCAT-B	TF_motif_seq_0257	-87	-	ATCGG	NF-YB	Os01g0834400;Os02g0725900;Os05g0463800;Os05g0573500
TdBCAT-B	TF_motif_seq_0257	-78	+	CCATT	NF-YB	Os01g0834400;Os02g0725900;Os05g0463800;Os05g0573500
TdBCAT-B	TF_motif_seq_0257	-71	-	ATTGC	NF-YB	Os01g0834400;Os02g0725900;Os05g0463800;Os05g0573500
TdBCAT-A	TF_motif_seq_0257	-65	+	CCATT	NF-YB	Os01g0834400;Os02g0725900;Os05g0463800;Os05g0573500
TdBCAT-A	TF_motif_seq_0257	-63	-	ATTGC	NF-YB	Os01g0834400;Os02g0725900;Os05g0463800;Os05g0573500
TdBCAT-B	TF_motif_seq_0257	-47	-	GTTGG	NF-YB	Os01g0834400;Os02g0725900;Os05g0463800;Os05g0573500
TdBCAT-A	TF_motif_seq_0257	-28	-	TTTGG	NF-YB	Os01g0834400;Os02g0725900;Os05g0463800;Os05g0573500
TdBCAT-A	TF_motif_seq_0508	-896	+	taCGTTCat	SBP	Os01g0292900;Os01g0922600;Os02g0139400;Os02g0174100;Os02g0177300;Os03g0833300;Os04g0551500;Os05g0408200;Os06g0659100;Os06g0663500;Os06g0703500;Os08g0509600;Os08g0513700;Os08g0531600;Os09g0491532;Os09g0507100;Os11g0496600
TdBCAT-B	TFmatrixID_0522	-723	+	ttcattGTACTgttat	SBP	Os01g0922600;Os02g0177300;Os03g0833300;Os04g0551500;Os04g0656500;Os06g0659100;LOC_Os07g32170;Os08g0509600;Os08g0513700;Os08g0531600;Os09g0507100
TdBCAT-B	TFmatrixID_0523	-723	-	ttcatTGTACtgttat	SBP	Os01g0922600;Os02g0139400;Os02g0174100;Os02g0177300;Os03g0833300;Os04g0551500;Os04g0656500;Os06g0659100;Os06g0703500;LOC_Os07g32170;Os08g0509600;Os08g0513700;Os08g0531600;Os09g0507100;Os11g0496600
TdBCAT-B	TF_motif_seq_0508	-719	-	ttGTACTgt	SBP	Os01g0292900;Os01g0922600;Os02g0139400;Os02g0174100;Os02g0177300;Os03g0833300;Os04g0551500;Os05g0408200;Os06g0659100;Os06g0663500;Os06g0703500;Os08g0509600;Os08g0513700;Os08g0531600;Os09g0491532;Os09g0507100;Os11g0496600
TdBCAT-B	TF_motif_seq_0508	-135	+	ttCGTCCga	SBP	Os01g0292900;Os01g0922600;Os02g0139400;Os02g0174100;Os02g0177300;Os03g0833300;Os04g0551500;Os05g0408200;Os06g0659100;Os06g0663500;Os06g0703500;Os08g0509600;Os08g0513700;Os08g0531600;Os09g0491532;Os09g0507100;Os11g0496600
TdBCAT-A	TF_motif_seq_0508	-71	+	tgCGAACca	SBP	Os01g0292900;Os01g0922600;Os02g0139400;Os02g0174100;Os02g0177300;Os03g0833300;Os04g0551500;Os05g0408200;Os06g0659100;Os06g0663500;Os06g0703500;Os08g0509600;Os08g0513700;Os08g0531600;Os09g0491532;Os09g0507100;Os11g0496600
TdBCAT-A	TFmatrixID_0522	-18	+	gcgggcGTACGtgcgt	SBP	Os01g0922600;Os02g0177300;Os03g0833300;Os04g0551500;Os04g0656500;Os06g0659100;LOC_Os07g32170;Os08g0509600;Os08g0513700;Os08g0531600;Os09g0507100
TdBCAT-A	TFmatrixID_0522	-18	-	gcgggCGTACgtgcgt	SBP	Os01g0922600;Os02g0177300;Os03g0833300;Os04g0551500;Os04g0656500;Os06g0659100;LOC_Os07g32170;Os08g0509600;Os08g0513700;Os08g0531600;Os09g0507100
TdBCAT-B	TFmatrixID_0522	-18	+	ccgggcGTACGtgcgt	SBP	Os01g0922600;Os02g0177300;Os03g0833300;Os04g0551500;Os04g0656500;Os06g0659100;LOC_Os07g32170;Os08g0509600;Os08g0513700;Os08g0531600;Os09g0507100
TdBCAT-B	TFmatrixID_0522	-18	-	ccgggCGTACgtgcgt	SBP	Os01g0922600;Os02g0177300;Os03g0833300;Os04g0551500;Os04g0656500;Os06g0659100;LOC_Os07g32170;Os08g0509600;Os08g0513700;Os08g0531600;Os09g0507100
TdBCAT-A	TFmatrixID_0401	-16	+	gggcGTACGtgc	SBP	Os01g0922600;Os02g0139400;Os02g0174100;Os02g0177300;Os04g0656500;Os06g0659100;Os06g0663500;Os06g0703500;Os08g0509600;Os08g0531600;Os09g0507100;Os11g0496600
TdBCAT-A	TFmatrixID_0401	-16	-	gggCGTACgtgc	SBP	Os01g0922600;Os02g0139400;Os02g0174100;Os02g0177300;Os04g0656500;Os06g0659100;Os06g0663500;Os06g0703500;Os08g0509600;Os08g0531600;Os09g0507100;Os11g0496600
TdBCAT-B	TFmatrixID_0401	-16	+	gggcGTACGtgc	SBP	Os01g0922600;Os02g0139400;Os02g0174100;Os02g0177300;Os04g0656500;Os06g0659100;Os06g0663500;Os06g0703500;Os08g0509600;Os08g0531600;Os09g0507100;Os11g0496600
TdBCAT-B	TFmatrixID_0401	-16	-	gggCGTACgtgc	SBP	Os01g0922600;Os02g0139400;Os02g0174100;Os02g0177300;Os04g0656500;Os06g0659100;Os06g0663500;Os06g0703500;Os08g0509600;Os08g0531600;Os09g0507100;Os11g0496600
TdBCAT-A	TFmatrixID_0411	-16	+	gggcGTACGt	SBP	Os01g0922600;Os02g0139400;Os02g0174100;Os02g0177300;Os03g0833300;Os04g0656500;Os06g0659100;Os06g0703500;LOC_Os07g32170;Os08g0509600;Os08g0513700;Os08g0531600;Os09g0507100;Os11g0496600
TdBCAT-B	TFmatrixID_0411	-16	+	gggcGTACGt	SBP	Os01g0922600;Os02g0139400;Os02g0174100;Os02g0177300;Os03g0833300;Os04g0656500;Os06g0659100;Os06g0703500;LOC_Os07g32170;Os08g0509600;Os08g0513700;Os08g0531600;Os09g0507100;Os11g0496600
TdBCAT-A	TFmatrixID_0400	-15	+	ggcGTACGt	SBP	Os01g0292900;Os01g0922600;Os02g0177300;Os03g0833300;Os04g0656500;Os06g0659100;Os06g0703500;LOC_Os07g32170;Os08g0509600;Os08g0513700;Os08g0531600;Os09g0507100;Os11g0496600
TdBCAT-B	TFmatrixID_0400	-15	+	ggcGTACGt	SBP	Os01g0292900;Os01g0922600;Os02g0177300;Os03g0833300;Os04g0656500;Os06g0659100;Os06g0703500;LOC_Os07g32170;Os08g0509600;Os08g0513700;Os08g0531600;Os09g0507100;Os11g0496600
TdBCAT-A	TFmatrixID_0403	-15	+	ggCGTACgtg	SBP	Os01g0922600;Os02g0139400;Os02g0174100;Os02g0177300;Os03g0833300;Os04g0656500;Os06g0659100;Os06g0703500;LOC_Os07g32170;Os08g0509600;Os08g0513700;Os08g0531600;Os09g0507100;Os11g0496600
TdBCAT-A	TFmatrixID_0403	-15	-	ggcGTACGtg	SBP	Os01g0922600;Os02g0139400;Os02g0174100;Os02g0177300;Os03g0833300;Os04g0656500;Os06g0659100;Os06g0703500;LOC_Os07g32170;Os08g0509600;Os08g0513700;Os08g0531600;Os09g0507100;Os11g0496600
TdBCAT-B	TFmatrixID_0403	-15	+	ggCGTACgtg	SBP	Os01g0922600;Os02g0139400;Os02g0174100;Os02g0177300;Os03g0833300;Os04g0656500;Os06g0659100;Os06g0703500;LOC_Os07g32170;Os08g0509600;Os08g0513700;Os08g0531600;Os09g0507100;Os11g0496600
TdBCAT-B	TFmatrixID_0403	-15	-	ggcGTACGtg	SBP	Os01g0922600;Os02g0139400;Os02g0174100;Os02g0177300;Os03g0833300;Os04g0656500;Os06g0659100;Os06g0703500;LOC_Os07g32170;Os08g0509600;Os08g0513700;Os08g0531600;Os09g0507100;Os11g0496600
TdBCAT-A	TFmatrixID_0404	-14	+	gcGTACGtg	SBP	Os03g0833300;Os04g0551500;Os06g0659100;LOC_Os07g32170;Os08g0509600;Os08g0513700
TdBCAT-B	TFmatrixID_0404	-14	+	gcGTACGtg	SBP	Os03g0833300;Os04g0551500;Os06g0659100;LOC_Os07g32170;Os08g0509600;Os08g0513700
TdBCAT-A	TFmatrixID_0402	-13	+	cGTACGtgc	SBP	Os02g0177300;Os03g0833300;Os04g0551500;Os04g0656500;Os06g0659100;LOC_Os07g32170;Os08g0509600;Os08g0513700;Os08g0531600;Os09g0507100
TdBCAT-B	TFmatrixID_0402	-13	+	cGTACGtgc	SBP	Os02g0177300;Os03g0833300;Os04g0551500;Os04g0656500;Os06g0659100;LOC_Os07g32170;Os08g0509600;Os08g0513700;Os08g0531600;Os09g0507100
TdBCAT-A	TFmatrixID_0417	-996	-	atGGTCGga	Storekeeper	Os03g0370250;Os07g0636100
TdBCAT-A	TFmatrixID_0417	-948	-	tcGGTCGgg	Storekeeper	Os03g0370250;Os07g0636100
TdBCAT-A	TFmatrixID_0417	-208	-	agGGTCGga	Storekeeper	Os03g0370250;Os07g0636100
TdBCAT-A	TFmatrixID_0570	-262	+	gccaTAAAAa	TBP	Os10g0432300;Os12g0580300
TdBCAT-B	TF_motif_seq_0266	-1000	+	CGGCC	TCP	Os03g0785800;Os04g0194600;Os12g0616400;Os01g0213800;Os08g0544800;Os11g0175700
TdBCAT-B	TF_motif_seq_0266	-1000	-	CGGCC	TCP	Os03g0785800;Os04g0194600;Os12g0616400;Os01g0213800;Os08g0544800;Os11g0175700
TdBCAT-B	TF_motif_seq_0266	-999	+	GGCCC	TCP	Os03g0785800;Os04g0194600;Os12g0616400;Os01g0213800;Os08g0544800;Os11g0175700
TdBCAT-B	TF_motif_seq_0266	-999	-	GGCCC	TCP	Os03g0785800;Os04g0194600;Os12g0616400;Os01g0213800;Os08g0544800;Os11g0175700
TdBCAT-B	TF_motif_seq_0266	-998	+	GCCCC	TCP	Os03g0785800;Os04g0194600;Os12g0616400;Os01g0213800;Os08g0544800;Os11g0175700
TdBCAT-B	TF_motif_seq_0266	-998	-	GCCCC	TCP	Os03g0785800;Os04g0194600;Os12g0616400;Os01g0213800;Os08g0544800;Os11g0175700
TdBCAT-A	TF_motif_seq_0266	-994	+	GGTCG	TCP	Os03g0785800;Os04g0194600;Os12g0616400;Os01g0213800;Os08g0544800;Os11g0175700
TdBCAT-A	TF_motif_seq_0266	-994	-	GGTCG	TCP	Os03g0785800;Os04g0194600;Os12g0616400;Os01g0213800;Os08g0544800;Os11g0175700
TdBCAT-B	TF_motif_seq_0266	-993	+	GGGGC	TCP	Os03g0785800;Os04g0194600;Os12g0616400;Os01g0213800;Os08g0544800;Os11g0175700
TdBCAT-B	TF_motif_seq_0266	-993	-	GGGGC	TCP	Os03g0785800;Os04g0194600;Os12g0616400;Os01g0213800;Os08g0544800;Os11g0175700
TdBCAT-B	TF_motif_seq_0266	-992	+	GGGCT	TCP	Os03g0785800;Os04g0194600;Os12g0616400;Os01g0213800;Os08g0544800;Os11g0175700
TdBCAT-B	TF_motif_seq_0266	-992	-	GGGCT	TCP	Os03g0785800;Os04g0194600;Os12g0616400;Os01g0213800;Os08g0544800;Os11g0175700
TdBCAT-B	TF_motif_seq_0266	-991	+	GGCTC	TCP	Os03g0785800;Os04g0194600;Os12g0616400;Os01g0213800;Os08g0544800;Os11g0175700
TdBCAT-B	TF_motif_seq_0266	-991	-	GGCTC	TCP	Os03g0785800;Os04g0194600;Os12g0616400;Os01g0213800;Os08g0544800;Os11g0175700
TdBCAT-B	TF_motif_seq_0266	-984	+	GAACC	TCP	Os03g0785800;Os04g0194600;Os12g0616400;Os01g0213800;Os08g0544800;Os11g0175700
TdBCAT-B	TF_motif_seq_0266	-984	-	GAACC	TCP	Os03g0785800;Os04g0194600;Os12g0616400;Os01g0213800;Os08g0544800;Os11g0175700
TdBCAT-B	TFmatrixID_0532	-981	+	ccGGGTCcaa	TCP	Os01g0924400
TdBCAT-B	TF_motif_seq_0266	-979	+	GGGTC	TCP	Os03g0785800;Os04g0194600;Os12g0616400;Os01g0213800;Os08g0544800;Os11g0175700
TdBCAT-B	TF_motif_seq_0266	-979	-	GGGTC	TCP	Os03g0785800;Os04g0194600;Os12g0616400;Os01g0213800;Os08g0544800;Os11g0175700
TdBCAT-B	TF_motif_seq_0266	-978	+	GGTCC	TCP	Os03g0785800;Os04g0194600;Os12g0616400;Os01g0213800;Os08g0544800;Os11g0175700
TdBCAT-B	TF_motif_seq_0266	-978	-	GGTCC	TCP	Os03g0785800;Os04g0194600;Os12g0616400;Os01g0213800;Os08g0544800;Os11g0175700
TdBCAT-B	TF_motif_seq_0431	-978	+	GGTCCaat	TCP	Os04g0194600;Os08g0544800
TdBCAT-B	TF_motif_seq_0431	-964	-	atgGGTCC	TCP	Os04g0194600;Os08g0544800
TdBCAT-A	TF_motif_seq_0266	-962	+	GGATC	TCP	Os03g0785800;Os04g0194600;Os12g0616400;Os01g0213800;Os08g0544800;Os11g0175700
TdBCAT-A	TF_motif_seq_0266	-962	-	GGATC	TCP	Os03g0785800;Os04g0194600;Os12g0616400;Os01g0213800;Os08g0544800;Os11g0175700
TdBCAT-B	TF_motif_seq_0266	-962	+	GGGTC	TCP	Os03g0785800;Os04g0194600;Os12g0616400;Os01g0213800;Os08g0544800;Os11g0175700
TdBCAT-B	TF_motif_seq_0266	-962	-	GGGTC	TCP	Os03g0785800;Os04g0194600;Os12g0616400;Os01g0213800;Os08g0544800;Os11g0175700
TdBCAT-B	TF_motif_seq_0266	-961	+	GGTCC	TCP	Os03g0785800;Os04g0194600;Os12g0616400;Os01g0213800;Os08g0544800;Os11g0175700
TdBCAT-B	TF_motif_seq_0266	-961	-	GGTCC	TCP	Os03g0785800;Os04g0194600;Os12g0616400;Os01g0213800;Os08g0544800;Os11g0175700
TdBCAT-B	TF_motif_seq_0266	-955	+	GGTTC	TCP	Os03g0785800;Os04g0194600;Os12g0616400;Os01g0213800;Os08g0544800;Os11g0175700
TdBCAT-B	TF_motif_seq_0266	-955	-	GGTTC	TCP	Os03g0785800;Os04g0194600;Os12g0616400;Os01g0213800;Os08g0544800;Os11g0175700
TdBCAT-B	TF_motif_seq_0266	-949	+	GGACT	TCP	Os03g0785800;Os04g0194600;Os12g0616400;Os01g0213800;Os08g0544800;Os11g0175700
TdBCAT-B	TF_motif_seq_0266	-949	-	GGACT	TCP	Os03g0785800;Os04g0194600;Os12g0616400;Os01g0213800;Os08g0544800;Os11g0175700
TdBCAT-A	TF_motif_seq_0266	-946	+	GGTCG	TCP	Os03g0785800;Os04g0194600;Os12g0616400;Os01g0213800;Os08g0544800;Os11g0175700
TdBCAT-A	TF_motif_seq_0266	-946	-	GGTCG	TCP	Os03g0785800;Os04g0194600;Os12g0616400;Os01g0213800;Os08g0544800;Os11g0175700
TdBCAT-B	TF_motif_seq_0266	-944	+	GAACC	TCP	Os03g0785800;Os04g0194600;Os12g0616400;Os01g0213800;Os08g0544800;Os11g0175700
TdBCAT-B	TF_motif_seq_0266	-944	-	GAACC	TCP	Os03g0785800;Os04g0194600;Os12g0616400;Os01g0213800;Os08g0544800;Os11g0175700
TdBCAT-B	TF_motif_seq_0266	-939	+	GGAAC	TCP	Os03g0785800;Os04g0194600;Os12g0616400;Os01g0213800;Os08g0544800;Os11g0175700
TdBCAT-B	TF_motif_seq_0266	-939	-	GGAAC	TCP	Os03g0785800;Os04g0194600;Os12g0616400;Os01g0213800;Os08g0544800;Os11g0175700
TdBCAT-B	TF_motif_seq_0266	-930	+	GGGCT	TCP	Os03g0785800;Os04g0194600;Os12g0616400;Os01g0213800;Os08g0544800;Os11g0175700
TdBCAT-B	TF_motif_seq_0266	-930	-	GGGCT	TCP	Os03g0785800;Os04g0194600;Os12g0616400;Os01g0213800;Os08g0544800;Os11g0175700
TdBCAT-A	TF_motif_seq_0266	-926	+	GGATC	TCP	Os03g0785800;Os04g0194600;Os12g0616400;Os01g0213800;Os08g0544800;Os11g0175700
TdBCAT-A	TF_motif_seq_0266	-926	-	GGATC	TCP	Os03g0785800;Os04g0194600;Os12g0616400;Os01g0213800;Os08g0544800;Os11g0175700
TdBCAT-B	TF_motif_seq_0266	-926	+	TGACC	TCP	Os03g0785800;Os04g0194600;Os12g0616400;Os01g0213800;Os08g0544800;Os11g0175700
TdBCAT-B	TF_motif_seq_0266	-926	-	TGACC	TCP	Os03g0785800;Os04g0194600;Os12g0616400;Os01g0213800;Os08g0544800;Os11g0175700
TdBCAT-B	TF_motif_seq_0266	-925	+	GACCC	TCP	Os03g0785800;Os04g0194600;Os12g0616400;Os01g0213800;Os08g0544800;Os11g0175700
TdBCAT-B	TF_motif_seq_0266	-925	-	GACCC	TCP	Os03g0785800;Os04g0194600;Os12g0616400;Os01g0213800;Os08g0544800;Os11g0175700
TdBCAT-B	TF_motif_seq_0266	-921	+	CGGCC	TCP	Os03g0785800;Os04g0194600;Os12g0616400;Os01g0213800;Os08g0544800;Os11g0175700
TdBCAT-B	TF_motif_seq_0266	-921	-	CGGCC	TCP	Os03g0785800;Os04g0194600;Os12g0616400;Os01g0213800;Os08g0544800;Os11g0175700
TdBCAT-B	TF_motif_seq_0266	-920	+	GGCCT	TCP	Os03g0785800;Os04g0194600;Os12g0616400;Os01g0213800;Os08g0544800;Os11g0175700
TdBCAT-B	TF_motif_seq_0266	-920	-	GGCCT	TCP	Os03g0785800;Os04g0194600;Os12g0616400;Os01g0213800;Os08g0544800;Os11g0175700
TdBCAT-A	TF_motif_seq_0266	-915	+	GATCC	TCP	Os03g0785800;Os04g0194600;Os12g0616400;Os01g0213800;Os08g0544800;Os11g0175700
TdBCAT-A	TF_motif_seq_0266	-915	-	GATCC	TCP	Os03g0785800;Os04g0194600;Os12g0616400;Os01g0213800;Os08g0544800;Os11g0175700
TdBCAT-B	TF_motif_seq_0266	-915	+	GGACC	TCP	Os03g0785800;Os04g0194600;Os12g0616400;Os01g0213800;Os08g0544800;Os11g0175700
TdBCAT-B	TF_motif_seq_0266	-915	-	GGACC	TCP	Os03g0785800;Os04g0194600;Os12g0616400;Os01g0213800;Os08g0544800;Os11g0175700
TdBCAT-A	TF_motif_seq_0266	-910	+	GGTCT	TCP	Os03g0785800;Os04g0194600;Os12g0616400;Os01g0213800;Os08g0544800;Os11g0175700
TdBCAT-A	TF_motif_seq_0266	-910	-	GGTCT	TCP	Os03g0785800;Os04g0194600;Os12g0616400;Os01g0213800;Os08g0544800;Os11g0175700
TdBCAT-B	TF_motif_seq_0266	-908	+	TGTCC	TCP	Os03g0785800;Os04g0194600;Os12g0616400;Os01g0213800;Os08g0544800;Os11g0175700
TdBCAT-B	TF_motif_seq_0266	-908	-	TGTCC	TCP	Os03g0785800;Os04g0194600;Os12g0616400;Os01g0213800;Os08g0544800;Os11g0175700
TdBCAT-B	TF_motif_seq_0266	-907	+	GTCCC	TCP	Os03g0785800;Os04g0194600;Os12g0616400;Os01g0213800;Os08g0544800;Os11g0175700
TdBCAT-B	TF_motif_seq_0266	-907	-	GTCCC	TCP	Os03g0785800;Os04g0194600;Os12g0616400;Os01g0213800;Os08g0544800;Os11g0175700
TdBCAT-A	TF_motif_seq_0266	-903	+	GGTCA	TCP	Os03g0785800;Os04g0194600;Os12g0616400;Os01g0213800;Os08g0544800;Os11g0175700
TdBCAT-A	TF_motif_seq_0266	-903	-	GGTCA	TCP	Os03g0785800;Os04g0194600;Os12g0616400;Os01g0213800;Os08g0544800;Os11g0175700
TdBCAT-B	TF_motif_seq_0266	-891	+	GTGCC	TCP	Os03g0785800;Os04g0194600;Os12g0616400;Os01g0213800;Os08g0544800;Os11g0175700
TdBCAT-B	TF_motif_seq_0266	-891	-	GTGCC	TCP	Os03g0785800;Os04g0194600;Os12g0616400;Os01g0213800;Os08g0544800;Os11g0175700
TdBCAT-B	TF_motif_seq_0266	-882	+	AGGCC	TCP	Os03g0785800;Os04g0194600;Os12g0616400;Os01g0213800;Os08g0544800;Os11g0175700
TdBCAT-B	TF_motif_seq_0266	-882	-	AGGCC	TCP	Os03g0785800;Os04g0194600;Os12g0616400;Os01g0213800;Os08g0544800;Os11g0175700
TdBCAT-B	TF_motif_seq_0266	-881	+	GGCCT	TCP	Os03g0785800;Os04g0194600;Os12g0616400;Os01g0213800;Os08g0544800;Os11g0175700
TdBCAT-B	TF_motif_seq_0266	-881	-	GGCCT	TCP	Os03g0785800;Os04g0194600;Os12g0616400;Os01g0213800;Os08g0544800;Os11g0175700
TdBCAT-A	TF_motif_seq_0431	-877	-	gttGGATC	TCP	Os04g0194600;Os08g0544800
TdBCAT-A	TF_motif_seq_0266	-874	+	GGATC	TCP	Os03g0785800;Os04g0194600;Os12g0616400;Os01g0213800;Os08g0544800;Os11g0175700
TdBCAT-A	TF_motif_seq_0266	-874	-	GGATC	TCP	Os03g0785800;Os04g0194600;Os12g0616400;Os01g0213800;Os08g0544800;Os11g0175700
TdBCAT-A	TF_motif_seq_0266	-873	+	GATCC	TCP	Os03g0785800;Os04g0194600;Os12g0616400;Os01g0213800;Os08g0544800;Os11g0175700
TdBCAT-A	TF_motif_seq_0266	-873	-	GATCC	TCP	Os03g0785800;Os04g0194600;Os12g0616400;Os01g0213800;Os08g0544800;Os11g0175700
TdBCAT-B	TF_motif_seq_0266	-837	+	TGCCC	TCP	Os03g0785800;Os04g0194600;Os12g0616400;Os01g0213800;Os08g0544800;Os11g0175700
TdBCAT-B	TF_motif_seq_0266	-837	-	TGCCC	TCP	Os03g0785800;Os04g0194600;Os12g0616400;Os01g0213800;Os08g0544800;Os11g0175700
TdBCAT-B	TF_motif_seq_0266	-831	+	GCTCC	TCP	Os03g0785800;Os04g0194600;Os12g0616400;Os01g0213800;Os08g0544800;Os11g0175700
TdBCAT-B	TF_motif_seq_0266	-831	-	GCTCC	TCP	Os03g0785800;Os04g0194600;Os12g0616400;Os01g0213800;Os08g0544800;Os11g0175700
TdBCAT-B	TF_motif_seq_0431	-831	+	GCTCCaac	TCP	Os04g0194600;Os08g0544800
TdBCAT-A	TF_motif_seq_0266	-826	+	GGTGC	TCP	Os03g0785800;Os04g0194600;Os12g0616400;Os01g0213800;Os08g0544800;Os11g0175700
TdBCAT-A	TF_motif_seq_0266	-826	-	GGTGC	TCP	Os03g0785800;Os04g0194600;Os12g0616400;Os01g0213800;Os08g0544800;Os11g0175700
TdBCAT-A	TFmatrixID_0440	-820	-	ctGGTCCt	TCP	Os01g0763200;Os03g0706500;Os03g0785800;Os05g0513100;LOC_Os07g04510;Os07g0152000;LOC_Os12g02090;Os12g0616400
TdBCAT-A	TF_motif_seq_0266	-818	+	GGTCC	TCP	Os03g0785800;Os04g0194600;Os12g0616400;Os01g0213800;Os08g0544800;Os11g0175700
TdBCAT-A	TF_motif_seq_0266	-818	-	GGTCC	TCP	Os03g0785800;Os04g0194600;Os12g0616400;Os01g0213800;Os08g0544800;Os11g0175700
TdBCAT-A	TF_motif_seq_0431	-818	+	GGTCCtat	TCP	Os04g0194600;Os08g0544800
TdBCAT-B	TF_motif_seq_0266	-817	+	GGGCG	TCP	Os03g0785800;Os04g0194600;Os12g0616400;Os01g0213800;Os08g0544800;Os11g0175700
TdBCAT-B	TF_motif_seq_0266	-817	-	GGGCG	TCP	Os03g0785800;Os04g0194600;Os12g0616400;Os01g0213800;Os08g0544800;Os11g0175700
TdBCAT-A	TF_motif_seq_0431	-812	-	ataGGACC	TCP	Os04g0194600;Os08g0544800
TdBCAT-A	TF_motif_seq_0266	-809	+	GGACC	TCP	Os03g0785800;Os04g0194600;Os12g0616400;Os01g0213800;Os08g0544800;Os11g0175700
TdBCAT-A	TF_motif_seq_0266	-809	-	GGACC	TCP	Os03g0785800;Os04g0194600;Os12g0616400;Os01g0213800;Os08g0544800;Os11g0175700
TdBCAT-B	TF_motif_seq_0266	-801	+	GCGCC	TCP	Os03g0785800;Os04g0194600;Os12g0616400;Os01g0213800;Os08g0544800;Os11g0175700
TdBCAT-B	TF_motif_seq_0266	-801	-	GCGCC	TCP	Os03g0785800;Os04g0194600;Os12g0616400;Os01g0213800;Os08g0544800;Os11g0175700
TdBCAT-B	TF_motif_seq_0266	-793	+	GGCTC	TCP	Os03g0785800;Os04g0194600;Os12g0616400;Os01g0213800;Os08g0544800;Os11g0175700
TdBCAT-B	TF_motif_seq_0266	-793	-	GGCTC	TCP	Os03g0785800;Os04g0194600;Os12g0616400;Os01g0213800;Os08g0544800;Os11g0175700
TdBCAT-A	TF_motif_seq_0266	-764	+	TGTCC	TCP	Os03g0785800;Os04g0194600;Os12g0616400;Os01g0213800;Os08g0544800;Os11g0175700
TdBCAT-A	TF_motif_seq_0266	-764	-	TGTCC	TCP	Os03g0785800;Os04g0194600;Os12g0616400;Os01g0213800;Os08g0544800;Os11g0175700
TdBCAT-B	TF_motif_seq_0266	-762	+	GGTCT	TCP	Os03g0785800;Os04g0194600;Os12g0616400;Os01g0213800;Os08g0544800;Os11g0175700
TdBCAT-B	TF_motif_seq_0266	-762	-	GGTCT	TCP	Os03g0785800;Os04g0194600;Os12g0616400;Os01g0213800;Os08g0544800;Os11g0175700
TdBCAT-A	TF_motif_seq_0266	-759	+	GGCAC	TCP	Os03g0785800;Os04g0194600;Os12g0616400;Os01g0213800;Os08g0544800;Os11g0175700
TdBCAT-A	TF_motif_seq_0266	-759	-	GGCAC	TCP	Os03g0785800;Os04g0194600;Os12g0616400;Os01g0213800;Os08g0544800;Os11g0175700
TdBCAT-A	TF_motif_seq_0266	-758	+	GCACC	TCP	Os03g0785800;Os04g0194600;Os12g0616400;Os01g0213800;Os08g0544800;Os11g0175700
TdBCAT-A	TF_motif_seq_0266	-758	-	GCACC	TCP	Os03g0785800;Os04g0194600;Os12g0616400;Os01g0213800;Os08g0544800;Os11g0175700
TdBCAT-A	TF_motif_seq_0431	-746	-	gagGGACG	TCP	Os04g0194600;Os08g0544800
TdBCAT-A	TF_motif_seq_0266	-744	+	GGGAC	TCP	Os03g0785800;Os04g0194600;Os12g0616400;Os01g0213800;Os08g0544800;Os11g0175700
TdBCAT-A	TF_motif_seq_0266	-744	-	GGGAC	TCP	Os03g0785800;Os04g0194600;Os12g0616400;Os01g0213800;Os08g0544800;Os11g0175700
TdBCAT-A	TF_motif_seq_0266	-743	+	GGACG	TCP	Os03g0785800;Os04g0194600;Os12g0616400;Os01g0213800;Os08g0544800;Os11g0175700
TdBCAT-A	TF_motif_seq_0266	-743	-	GGACG	TCP	Os03g0785800;Os04g0194600;Os12g0616400;Os01g0213800;Os08g0544800;Os11g0175700
TdBCAT-A	TF_motif_seq_0266	-727	+	GCGCC	TCP	Os03g0785800;Os04g0194600;Os12g0616400;Os01g0213800;Os08g0544800;Os11g0175700
TdBCAT-A	TF_motif_seq_0266	-727	-	GCGCC	TCP	Os03g0785800;Os04g0194600;Os12g0616400;Os01g0213800;Os08g0544800;Os11g0175700
TdBCAT-A	TF_motif_seq_0266	-719	+	GGCTC	TCP	Os03g0785800;Os04g0194600;Os12g0616400;Os01g0213800;Os08g0544800;Os11g0175700
TdBCAT-A	TF_motif_seq_0266	-719	-	GGCTC	TCP	Os03g0785800;Os04g0194600;Os12g0616400;Os01g0213800;Os08g0544800;Os11g0175700
TdBCAT-A	TF_motif_seq_0266	-686	+	GGTCT	TCP	Os03g0785800;Os04g0194600;Os12g0616400;Os01g0213800;Os08g0544800;Os11g0175700
TdBCAT-A	TF_motif_seq_0266	-686	-	GGTCT	TCP	Os03g0785800;Os04g0194600;Os12g0616400;Os01g0213800;Os08g0544800;Os11g0175700
TdBCAT-B	TF_motif_seq_0266	-635	+	GGGCA	TCP	Os03g0785800;Os04g0194600;Os12g0616400;Os01g0213800;Os08g0544800;Os11g0175700
TdBCAT-B	TF_motif_seq_0266	-635	-	GGGCA	TCP	Os03g0785800;Os04g0194600;Os12g0616400;Os01g0213800;Os08g0544800;Os11g0175700
TdBCAT-B	TF_motif_seq_0266	-580	+	GTTCC	TCP	Os03g0785800;Os04g0194600;Os12g0616400;Os01g0213800;Os08g0544800;Os11g0175700
TdBCAT-B	TF_motif_seq_0266	-580	-	GTTCC	TCP	Os03g0785800;Os04g0194600;Os12g0616400;Os01g0213800;Os08g0544800;Os11g0175700
TdBCAT-B	TF_motif_seq_0431	-580	+	GTTCCcag	TCP	Os04g0194600;Os08g0544800
TdBCAT-B	TF_motif_seq_0266	-570	+	GGTGC	TCP	Os03g0785800;Os04g0194600;Os12g0616400;Os01g0213800;Os08g0544800;Os11g0175700
TdBCAT-B	TF_motif_seq_0266	-570	-	GGTGC	TCP	Os03g0785800;Os04g0194600;Os12g0616400;Os01g0213800;Os08g0544800;Os11g0175700
TdBCAT-B	TF_motif_seq_0266	-569	+	GTGCC	TCP	Os03g0785800;Os04g0194600;Os12g0616400;Os01g0213800;Os08g0544800;Os11g0175700
TdBCAT-B	TF_motif_seq_0266	-569	-	GTGCC	TCP	Os03g0785800;Os04g0194600;Os12g0616400;Os01g0213800;Os08g0544800;Os11g0175700
TdBCAT-B	TF_motif_seq_0266	-564	+	GTGCC	TCP	Os03g0785800;Os04g0194600;Os12g0616400;Os01g0213800;Os08g0544800;Os11g0175700
TdBCAT-B	TF_motif_seq_0266	-564	-	GTGCC	TCP	Os03g0785800;Os04g0194600;Os12g0616400;Os01g0213800;Os08g0544800;Os11g0175700
TdBCAT-B	TF_motif_seq_0266	-558	+	GGCGC	TCP	Os03g0785800;Os04g0194600;Os12g0616400;Os01g0213800;Os08g0544800;Os11g0175700
TdBCAT-B	TF_motif_seq_0266	-558	-	GGCGC	TCP	Os03g0785800;Os04g0194600;Os12g0616400;Os01g0213800;Os08g0544800;Os11g0175700
TdBCAT-B	TFmatrixID_0532	-530	+	cgGGGTCcac	TCP	Os01g0924400
TdBCAT-A	TF_motif_seq_0266	-528	+	GTTCC	TCP	Os03g0785800;Os04g0194600;Os12g0616400;Os01g0213800;Os08g0544800;Os11g0175700
TdBCAT-A	TF_motif_seq_0266	-528	-	GTTCC	TCP	Os03g0785800;Os04g0194600;Os12g0616400;Os01g0213800;Os08g0544800;Os11g0175700
TdBCAT-B	TF_motif_seq_0266	-528	+	GGGTC	TCP	Os03g0785800;Os04g0194600;Os12g0616400;Os01g0213800;Os08g0544800;Os11g0175700
TdBCAT-B	TF_motif_seq_0266	-528	-	GGGTC	TCP	Os03g0785800;Os04g0194600;Os12g0616400;Os01g0213800;Os08g0544800;Os11g0175700
TdBCAT-A	TF_motif_seq_0431	-528	+	GTTCCcag	TCP	Os04g0194600;Os08g0544800
TdBCAT-B	TF_motif_seq_0266	-527	+	GGTCC	TCP	Os03g0785800;Os04g0194600;Os12g0616400;Os01g0213800;Os08g0544800;Os11g0175700
TdBCAT-B	TF_motif_seq_0266	-527	-	GGTCC	TCP	Os03g0785800;Os04g0194600;Os12g0616400;Os01g0213800;Os08g0544800;Os11g0175700
TdBCAT-A	TF_motif_seq_0266	-518	+	GGTGC	TCP	Os03g0785800;Os04g0194600;Os12g0616400;Os01g0213800;Os08g0544800;Os11g0175700
TdBCAT-A	TF_motif_seq_0266	-518	-	GGTGC	TCP	Os03g0785800;Os04g0194600;Os12g0616400;Os01g0213800;Os08g0544800;Os11g0175700
TdBCAT-A	TF_motif_seq_0266	-517	+	GTGCC	TCP	Os03g0785800;Os04g0194600;Os12g0616400;Os01g0213800;Os08g0544800;Os11g0175700
TdBCAT-A	TF_motif_seq_0266	-517	-	GTGCC	TCP	Os03g0785800;Os04g0194600;Os12g0616400;Os01g0213800;Os08g0544800;Os11g0175700
TdBCAT-B	TF_motif_seq_0266	-517	+	GTGCC	TCP	Os03g0785800;Os04g0194600;Os12g0616400;Os01g0213800;Os08g0544800;Os11g0175700
TdBCAT-B	TF_motif_seq_0266	-517	-	GTGCC	TCP	Os03g0785800;Os04g0194600;Os12g0616400;Os01g0213800;Os08g0544800;Os11g0175700
TdBCAT-B	TF_motif_seq_0430	-513	-	ctgGGCCC	TCP	Os04g0194600;Os08g0544800
TdBCAT-B	TF_motif_seq_0431	-513	-	ctgGGCCC	TCP	Os04g0194600;Os08g0544800
TdBCAT-B	TFmatrixID_0420	-513	+	ctGGGCCcac	TCP	Os01g0924400;Os02g0747400;Os04g0194600;Os06g0226700;Os09g0521300;Os12g0173300
TdBCAT-B	TFmatrixID_0420	-513	-	ctgGGCCCac	TCP	Os01g0924400;Os02g0747400;Os04g0194600;Os06g0226700;Os09g0521300;Os12g0173300
TdBCAT-B	TFmatrixID_0425	-513	+	ctGGGCCcac	TCP	Os01g0763200;Os03g0706500;Os03g0785800;Os05g0513100;LOC_Os07g04510;Os07g0152000;LOC_Os12g02090;Os12g0616400
TdBCAT-B	TFmatrixID_0425	-513	-	ctgGGCCCac	TCP	Os01g0763200;Os03g0706500;Os03g0785800;Os05g0513100;LOC_Os07g04510;Os07g0152000;LOC_Os12g02090;Os12g0616400
TdBCAT-B	TFmatrixID_0426	-513	+	ctgggCCCAC	TCP	Os01g0924400;Os02g0747400;Os04g0194600;Os04g0526000;Os06g0226700;Os09g0521300;Os12g0173300
TdBCAT-B	TFmatrixID_0428	-513	+	ctGGGCCcac	TCP	Os01g0763200;Os03g0706500;Os03g0785800;Os05g0513100;LOC_Os07g04510;Os07g0152000;LOC_Os12g02090;Os12g0616400
TdBCAT-B	TFmatrixID_0428	-513	-	ctgGGCCCac	TCP	Os01g0763200;Os03g0706500;Os03g0785800;Os05g0513100;LOC_Os07g04510;Os07g0152000;LOC_Os12g02090;Os12g0616400
TdBCAT-B	TFmatrixID_0433	-513	+	ctgggCCCAC	TCP	Os01g0924400;Os02g0747400;Os04g0194600;Os04g0526000;Os06g0226700;Os09g0521300;Os12g0173300
TdBCAT-B	TFmatrixID_0434	-513	+	ctGGGCCcac	TCP	Os01g0924400;Os02g0635800;Os04g0194600;Os04g0526000;Os09g0521300
TdBCAT-B	TFmatrixID_0434	-513	-	ctgGGCCCac	TCP	Os01g0924400;Os02g0635800;Os04g0194600;Os04g0526000;Os09g0521300
TdBCAT-A	TF_motif_seq_0266	-512	+	GTGCC	TCP	Os03g0785800;Os04g0194600;Os12g0616400;Os01g0213800;Os08g0544800;Os11g0175700
TdBCAT-A	TF_motif_seq_0266	-512	-	GTGCC	TCP	Os03g0785800;Os04g0194600;Os12g0616400;Os01g0213800;Os08g0544800;Os11g0175700
TdBCAT-B	TFmatrixID_0437	-512	+	tgggCCCACg	TCP	Os01g0924400;Os02g0747400;Os04g0194600;Os04g0526000;Os06g0226700;Os09g0521300
TdBCAT-B	TFmatrixID_0438	-512	+	tgggCCCAC	TCP	Os01g0924400;Os02g0747400;Os04g0194600;Os04g0526000;Os06g0226700;Os09g0521300;Os12g0173300
TdBCAT-B	TF_motif_seq_0266	-511	+	GGGCC	TCP	Os03g0785800;Os04g0194600;Os12g0616400;Os01g0213800;Os08g0544800;Os11g0175700
TdBCAT-B	TF_motif_seq_0266	-511	-	GGGCC	TCP	Os03g0785800;Os04g0194600;Os12g0616400;Os01g0213800;Os08g0544800;Os11g0175700
TdBCAT-B	TF_motif_seq_0430	-511	+	GGGCCcac	TCP	Os04g0194600;Os08g0544800
TdBCAT-B	TF_motif_seq_0431	-511	+	GGGCCcac	TCP	Os04g0194600;Os08g0544800
TdBCAT-B	TFmatrixID_0424	-511	+	gggCCCACgg	TCP	Os01g0924400;Os02g0747400;Os04g0194600;Os04g0526000;Os06g0226700;Os09g0521300;Os12g0173300
TdBCAT-B	TFmatrixID_0429	-511	+	gggCCCAC	TCP	Os01g0924400;Os02g0747400;Os04g0194600;Os04g0526000;Os06g0226700;Os09g0521300;Os12g0173300
TdBCAT-B	TFmatrixID_0430	-511	+	gggCCCAC	TCP	Os01g0763200;Os03g0706500;Os03g0785800;Os05g0513100;LOC_Os07g04510;Os07g0152000;LOC_Os12g02090
TdBCAT-B	TFmatrixID_0431	-511	+	gggCCCAC	TCP	Os01g0924400;Os02g0747400;Os04g0194600;Os04g0526000;Os06g0226700;Os09g0521300;Os12g0173300
TdBCAT-B	TFmatrixID_0435	-511	+	gggCCCAC	TCP	Os01g0924400;Os04g0194600;Os04g0526000;Os09g0521300;OsI_08196
TdBCAT-B	TFmatrixID_0439	-511	+	gggCCCAC	TCP	Os01g0924400;Os02g0747400;Os04g0194600;Os04g0526000;Os06g0226700;Os09g0521300;Os12g0173300
TdBCAT-B	TF_motif_seq_0266	-510	+	GGCCC	TCP	Os03g0785800;Os04g0194600;Os12g0616400;Os01g0213800;Os08g0544800;Os11g0175700
TdBCAT-B	TF_motif_seq_0266	-510	-	GGCCC	TCP	Os03g0785800;Os04g0194600;Os12g0616400;Os01g0213800;Os08g0544800;Os11g0175700
TdBCAT-A	TF_motif_seq_0266	-506	+	GGCGC	TCP	Os03g0785800;Os04g0194600;Os12g0616400;Os01g0213800;Os08g0544800;Os11g0175700
TdBCAT-A	TF_motif_seq_0266	-506	-	GGCGC	TCP	Os03g0785800;Os04g0194600;Os12g0616400;Os01g0213800;Os08g0544800;Os11g0175700
TdBCAT-B	TF_motif_seq_0266	-503	+	GGGTC	TCP	Os03g0785800;Os04g0194600;Os12g0616400;Os01g0213800;Os08g0544800;Os11g0175700
TdBCAT-B	TF_motif_seq_0266	-503	-	GGGTC	TCP	Os03g0785800;Os04g0194600;Os12g0616400;Os01g0213800;Os08g0544800;Os11g0175700
TdBCAT-B	TF_motif_seq_0266	-502	+	GGTCA	TCP	Os03g0785800;Os04g0194600;Os12g0616400;Os01g0213800;Os08g0544800;Os11g0175700
TdBCAT-B	TF_motif_seq_0266	-502	-	GGTCA	TCP	Os03g0785800;Os04g0194600;Os12g0616400;Os01g0213800;Os08g0544800;Os11g0175700
TdBCAT-B	TF_motif_seq_0266	-489	+	GGCAC	TCP	Os03g0785800;Os04g0194600;Os12g0616400;Os01g0213800;Os08g0544800;Os11g0175700
TdBCAT-B	TF_motif_seq_0266	-489	-	GGCAC	TCP	Os03g0785800;Os04g0194600;Os12g0616400;Os01g0213800;Os08g0544800;Os11g0175700
TdBCAT-B	TF_motif_seq_0266	-488	+	GCACC	TCP	Os03g0785800;Os04g0194600;Os12g0616400;Os01g0213800;Os08g0544800;Os11g0175700
TdBCAT-B	TF_motif_seq_0266	-488	-	GCACC	TCP	Os03g0785800;Os04g0194600;Os12g0616400;Os01g0213800;Os08g0544800;Os11g0175700
TdBCAT-A	TFmatrixID_0532	-478	+	cgGGGTCcac	TCP	Os01g0924400
TdBCAT-B	TF_motif_seq_0266	-477	+	TGTCC	TCP	Os03g0785800;Os04g0194600;Os12g0616400;Os01g0213800;Os08g0544800;Os11g0175700
TdBCAT-B	TF_motif_seq_0266	-477	-	TGTCC	TCP	Os03g0785800;Os04g0194600;Os12g0616400;Os01g0213800;Os08g0544800;Os11g0175700
TdBCAT-A	TF_motif_seq_0266	-476	+	GGGTC	TCP	Os03g0785800;Os04g0194600;Os12g0616400;Os01g0213800;Os08g0544800;Os11g0175700
TdBCAT-A	TF_motif_seq_0266	-476	-	GGGTC	TCP	Os03g0785800;Os04g0194600;Os12g0616400;Os01g0213800;Os08g0544800;Os11g0175700
TdBCAT-A	TF_motif_seq_0266	-475	+	GGTCC	TCP	Os03g0785800;Os04g0194600;Os12g0616400;Os01g0213800;Os08g0544800;Os11g0175700
TdBCAT-A	TF_motif_seq_0266	-475	-	GGTCC	TCP	Os03g0785800;Os04g0194600;Os12g0616400;Os01g0213800;Os08g0544800;Os11g0175700
TdBCAT-A	TF_motif_seq_0266	-465	+	GTGCC	TCP	Os03g0785800;Os04g0194600;Os12g0616400;Os01g0213800;Os08g0544800;Os11g0175700
TdBCAT-A	TF_motif_seq_0266	-465	-	GTGCC	TCP	Os03g0785800;Os04g0194600;Os12g0616400;Os01g0213800;Os08g0544800;Os11g0175700
TdBCAT-A	TF_motif_seq_0430	-461	-	ctgGGCCC	TCP	Os04g0194600;Os08g0544800
TdBCAT-A	TF_motif_seq_0431	-461	-	ctgGGCCC	TCP	Os04g0194600;Os08g0544800
TdBCAT-A	TFmatrixID_0420	-461	+	ctGGGCCcac	TCP	Os01g0924400;Os02g0747400;Os04g0194600;Os06g0226700;Os09g0521300;Os12g0173300
TdBCAT-A	TFmatrixID_0420	-461	-	ctgGGCCCac	TCP	Os01g0924400;Os02g0747400;Os04g0194600;Os06g0226700;Os09g0521300;Os12g0173300
TdBCAT-A	TFmatrixID_0425	-461	+	ctGGGCCcac	TCP	Os01g0763200;Os03g0706500;Os03g0785800;Os05g0513100;LOC_Os07g04510;Os07g0152000;LOC_Os12g02090;Os12g0616400
TdBCAT-A	TFmatrixID_0425	-461	-	ctgGGCCCac	TCP	Os01g0763200;Os03g0706500;Os03g0785800;Os05g0513100;LOC_Os07g04510;Os07g0152000;LOC_Os12g02090;Os12g0616400
TdBCAT-A	TFmatrixID_0426	-461	+	ctgggCCCAC	TCP	Os01g0924400;Os02g0747400;Os04g0194600;Os04g0526000;Os06g0226700;Os09g0521300;Os12g0173300
TdBCAT-A	TFmatrixID_0428	-461	+	ctGGGCCcac	TCP	Os01g0763200;Os03g0706500;Os03g0785800;Os05g0513100;LOC_Os07g04510;Os07g0152000;LOC_Os12g02090;Os12g0616400
TdBCAT-A	TFmatrixID_0428	-461	-	ctgGGCCCac	TCP	Os01g0763200;Os03g0706500;Os03g0785800;Os05g0513100;LOC_Os07g04510;Os07g0152000;LOC_Os12g02090;Os12g0616400
TdBCAT-A	TFmatrixID_0433	-461	+	ctgggCCCAC	TCP	Os01g0924400;Os02g0747400;Os04g0194600;Os04g0526000;Os06g0226700;Os09g0521300;Os12g0173300
TdBCAT-A	TFmatrixID_0434	-461	+	ctGGGCCcac	TCP	Os01g0924400;Os02g0635800;Os04g0194600;Os04g0526000;Os09g0521300
TdBCAT-A	TFmatrixID_0434	-461	-	ctgGGCCCac	TCP	Os01g0924400;Os02g0635800;Os04g0194600;Os04g0526000;Os09g0521300
TdBCAT-A	TFmatrixID_0437	-460	+	tgggCCCACg	TCP	Os01g0924400;Os02g0747400;Os04g0194600;Os04g0526000;Os06g0226700;Os09g0521300
TdBCAT-A	TFmatrixID_0438	-460	+	tgggCCCAC	TCP	Os01g0924400;Os02g0747400;Os04g0194600;Os04g0526000;Os06g0226700;Os09g0521300;Os12g0173300
TdBCAT-A	TF_motif_seq_0266	-459	+	GGGCC	TCP	Os03g0785800;Os04g0194600;Os12g0616400;Os01g0213800;Os08g0544800;Os11g0175700
TdBCAT-A	TF_motif_seq_0266	-459	-	GGGCC	TCP	Os03g0785800;Os04g0194600;Os12g0616400;Os01g0213800;Os08g0544800;Os11g0175700
TdBCAT-A	TF_motif_seq_0430	-459	+	GGGCCcac	TCP	Os04g0194600;Os08g0544800
TdBCAT-A	TF_motif_seq_0431	-459	+	GGGCCcac	TCP	Os04g0194600;Os08g0544800
TdBCAT-A	TFmatrixID_0424	-459	+	gggCCCACgg	TCP	Os01g0924400;Os02g0747400;Os04g0194600;Os04g0526000;Os06g0226700;Os09g0521300;Os12g0173300
TdBCAT-A	TFmatrixID_0429	-459	+	gggCCCAC	TCP	Os01g0924400;Os02g0747400;Os04g0194600;Os04g0526000;Os06g0226700;Os09g0521300;Os12g0173300
TdBCAT-A	TFmatrixID_0430	-459	+	gggCCCAC	TCP	Os01g0763200;Os03g0706500;Os03g0785800;Os05g0513100;LOC_Os07g04510;Os07g0152000;LOC_Os12g02090
TdBCAT-A	TFmatrixID_0431	-459	+	gggCCCAC	TCP	Os01g0924400;Os02g0747400;Os04g0194600;Os04g0526000;Os06g0226700;Os09g0521300;Os12g0173300
TdBCAT-A	TFmatrixID_0435	-459	+	gggCCCAC	TCP	Os01g0924400;Os04g0194600;Os04g0526000;Os09g0521300;OsI_08196
TdBCAT-A	TFmatrixID_0439	-459	+	gggCCCAC	TCP	Os01g0924400;Os02g0747400;Os04g0194600;Os04g0526000;Os06g0226700;Os09g0521300;Os12g0173300
TdBCAT-A	TF_motif_seq_0266	-458	+	GGCCC	TCP	Os03g0785800;Os04g0194600;Os12g0616400;Os01g0213800;Os08g0544800;Os11g0175700
TdBCAT-A	TF_motif_seq_0266	-458	-	GGCCC	TCP	Os03g0785800;Os04g0194600;Os12g0616400;Os01g0213800;Os08g0544800;Os11g0175700
TdBCAT-B	TF_motif_seq_0266	-455	+	CGTCC	TCP	Os03g0785800;Os04g0194600;Os12g0616400;Os01g0213800;Os08g0544800;Os11g0175700
TdBCAT-B	TF_motif_seq_0266	-455	-	CGTCC	TCP	Os03g0785800;Os04g0194600;Os12g0616400;Os01g0213800;Os08g0544800;Os11g0175700
TdBCAT-A	TF_motif_seq_0266	-451	+	GGGTC	TCP	Os03g0785800;Os04g0194600;Os12g0616400;Os01g0213800;Os08g0544800;Os11g0175700
TdBCAT-A	TF_motif_seq_0266	-451	-	GGGTC	TCP	Os03g0785800;Os04g0194600;Os12g0616400;Os01g0213800;Os08g0544800;Os11g0175700
TdBCAT-A	TF_motif_seq_0266	-450	+	GGTCA	TCP	Os03g0785800;Os04g0194600;Os12g0616400;Os01g0213800;Os08g0544800;Os11g0175700
TdBCAT-A	TF_motif_seq_0266	-450	-	GGTCA	TCP	Os03g0785800;Os04g0194600;Os12g0616400;Os01g0213800;Os08g0544800;Os11g0175700
TdBCAT-B	TF_motif_seq_0266	-432	+	GCTCC	TCP	Os03g0785800;Os04g0194600;Os12g0616400;Os01g0213800;Os08g0544800;Os11g0175700
TdBCAT-B	TF_motif_seq_0266	-432	-	GCTCC	TCP	Os03g0785800;Os04g0194600;Os12g0616400;Os01g0213800;Os08g0544800;Os11g0175700
TdBCAT-B	TF_motif_seq_0266	-418	+	GGCAC	TCP	Os03g0785800;Os04g0194600;Os12g0616400;Os01g0213800;Os08g0544800;Os11g0175700
TdBCAT-B	TF_motif_seq_0266	-418	-	GGCAC	TCP	Os03g0785800;Os04g0194600;Os12g0616400;Os01g0213800;Os08g0544800;Os11g0175700
TdBCAT-B	TF_motif_seq_0266	-412	+	GGCTC	TCP	Os03g0785800;Os04g0194600;Os12g0616400;Os01g0213800;Os08g0544800;Os11g0175700
TdBCAT-B	TF_motif_seq_0266	-412	-	GGCTC	TCP	Os03g0785800;Os04g0194600;Os12g0616400;Os01g0213800;Os08g0544800;Os11g0175700
TdBCAT-B	TF_motif_seq_0266	-411	+	GCTCC	TCP	Os03g0785800;Os04g0194600;Os12g0616400;Os01g0213800;Os08g0544800;Os11g0175700
TdBCAT-B	TF_motif_seq_0266	-411	-	GCTCC	TCP	Os03g0785800;Os04g0194600;Os12g0616400;Os01g0213800;Os08g0544800;Os11g0175700
TdBCAT-B	TF_motif_seq_0431	-411	+	GCTCCccc	TCP	Os04g0194600;Os08g0544800
TdBCAT-A	TF_motif_seq_0266	-392	+	GCTCC	TCP	Os03g0785800;Os04g0194600;Os12g0616400;Os01g0213800;Os08g0544800;Os11g0175700
TdBCAT-A	TF_motif_seq_0266	-392	-	GCTCC	TCP	Os03g0785800;Os04g0194600;Os12g0616400;Os01g0213800;Os08g0544800;Os11g0175700
TdBCAT-A	TF_motif_seq_0266	-378	+	GGCGC	TCP	Os03g0785800;Os04g0194600;Os12g0616400;Os01g0213800;Os08g0544800;Os11g0175700
TdBCAT-A	TF_motif_seq_0266	-378	-	GGCGC	TCP	Os03g0785800;Os04g0194600;Os12g0616400;Os01g0213800;Os08g0544800;Os11g0175700
TdBCAT-A	TF_motif_seq_0266	-368	+	GGATC	TCP	Os03g0785800;Os04g0194600;Os12g0616400;Os01g0213800;Os08g0544800;Os11g0175700
TdBCAT-A	TF_motif_seq_0266	-368	-	GGATC	TCP	Os03g0785800;Os04g0194600;Os12g0616400;Os01g0213800;Os08g0544800;Os11g0175700
TdBCAT-A	TF_motif_seq_0266	-367	+	GATCC	TCP	Os03g0785800;Os04g0194600;Os12g0616400;Os01g0213800;Os08g0544800;Os11g0175700
TdBCAT-A	TF_motif_seq_0266	-367	-	GATCC	TCP	Os03g0785800;Os04g0194600;Os12g0616400;Os01g0213800;Os08g0544800;Os11g0175700
TdBCAT-A	TF_motif_seq_0431	-367	+	GATCCccc	TCP	Os04g0194600;Os08g0544800
TdBCAT-A	TF_motif_seq_0266	-351	+	AGTCC	TCP	Os03g0785800;Os04g0194600;Os12g0616400;Os01g0213800;Os08g0544800;Os11g0175700
TdBCAT-A	TF_motif_seq_0266	-351	-	AGTCC	TCP	Os03g0785800;Os04g0194600;Os12g0616400;Os01g0213800;Os08g0544800;Os11g0175700
TdBCAT-A	TF_motif_seq_0266	-350	+	GTCCC	TCP	Os03g0785800;Os04g0194600;Os12g0616400;Os01g0213800;Os08g0544800;Os11g0175700
TdBCAT-A	TF_motif_seq_0266	-350	-	GTCCC	TCP	Os03g0785800;Os04g0194600;Os12g0616400;Os01g0213800;Os08g0544800;Os11g0175700
TdBCAT-A	TF_motif_seq_0266	-339	+	GGGCA	TCP	Os03g0785800;Os04g0194600;Os12g0616400;Os01g0213800;Os08g0544800;Os11g0175700
TdBCAT-A	TF_motif_seq_0266	-339	-	GGGCA	TCP	Os03g0785800;Os04g0194600;Os12g0616400;Os01g0213800;Os08g0544800;Os11g0175700
TdBCAT-A	TF_motif_seq_0266	-338	+	GGCAC	TCP	Os03g0785800;Os04g0194600;Os12g0616400;Os01g0213800;Os08g0544800;Os11g0175700
TdBCAT-A	TF_motif_seq_0266	-338	-	GGCAC	TCP	Os03g0785800;Os04g0194600;Os12g0616400;Os01g0213800;Os08g0544800;Os11g0175700
TdBCAT-B	TF_motif_seq_0266	-256	+	TGGCC	TCP	Os03g0785800;Os04g0194600;Os12g0616400;Os01g0213800;Os08g0544800;Os11g0175700
TdBCAT-B	TF_motif_seq_0266	-256	-	TGGCC	TCP	Os03g0785800;Os04g0194600;Os12g0616400;Os01g0213800;Os08g0544800;Os11g0175700
TdBCAT-B	TF_motif_seq_0266	-255	+	GGCCT	TCP	Os03g0785800;Os04g0194600;Os12g0616400;Os01g0213800;Os08g0544800;Os11g0175700
TdBCAT-B	TF_motif_seq_0266	-255	-	GGCCT	TCP	Os03g0785800;Os04g0194600;Os12g0616400;Os01g0213800;Os08g0544800;Os11g0175700
TdBCAT-A	TF_motif_seq_0266	-220	+	TGGCC	TCP	Os03g0785800;Os04g0194600;Os12g0616400;Os01g0213800;Os08g0544800;Os11g0175700
TdBCAT-A	TF_motif_seq_0266	-220	-	TGGCC	TCP	Os03g0785800;Os04g0194600;Os12g0616400;Os01g0213800;Os08g0544800;Os11g0175700
TdBCAT-A	TF_motif_seq_0266	-219	+	GGCCT	TCP	Os03g0785800;Os04g0194600;Os12g0616400;Os01g0213800;Os08g0544800;Os11g0175700
TdBCAT-A	TF_motif_seq_0266	-219	-	GGCCT	TCP	Os03g0785800;Os04g0194600;Os12g0616400;Os01g0213800;Os08g0544800;Os11g0175700
TdBCAT-A	TF_motif_seq_0266	-207	+	GGGTC	TCP	Os03g0785800;Os04g0194600;Os12g0616400;Os01g0213800;Os08g0544800;Os11g0175700
TdBCAT-A	TF_motif_seq_0266	-207	-	GGGTC	TCP	Os03g0785800;Os04g0194600;Os12g0616400;Os01g0213800;Os08g0544800;Os11g0175700
TdBCAT-A	TF_motif_seq_0266	-206	+	GGTCG	TCP	Os03g0785800;Os04g0194600;Os12g0616400;Os01g0213800;Os08g0544800;Os11g0175700
TdBCAT-A	TF_motif_seq_0266	-206	-	GGTCG	TCP	Os03g0785800;Os04g0194600;Os12g0616400;Os01g0213800;Os08g0544800;Os11g0175700
TdBCAT-B	TF_motif_seq_0266	-198	+	CGACC	TCP	Os03g0785800;Os04g0194600;Os12g0616400;Os01g0213800;Os08g0544800;Os11g0175700
TdBCAT-B	TF_motif_seq_0266	-198	-	CGACC	TCP	Os03g0785800;Os04g0194600;Os12g0616400;Os01g0213800;Os08g0544800;Os11g0175700
TdBCAT-A	TF_motif_seq_0266	-187	+	GATCC	TCP	Os03g0785800;Os04g0194600;Os12g0616400;Os01g0213800;Os08g0544800;Os11g0175700
TdBCAT-A	TF_motif_seq_0266	-187	-	GATCC	TCP	Os03g0785800;Os04g0194600;Os12g0616400;Os01g0213800;Os08g0544800;Os11g0175700
TdBCAT-A	TF_motif_seq_0431	-187	+	GATCCaac	TCP	Os04g0194600;Os08g0544800
TdBCAT-A	TF_motif_seq_0266	-161	+	CGACC	TCP	Os03g0785800;Os04g0194600;Os12g0616400;Os01g0213800;Os08g0544800;Os11g0175700
TdBCAT-A	TF_motif_seq_0266	-161	-	CGACC	TCP	Os03g0785800;Os04g0194600;Os12g0616400;Os01g0213800;Os08g0544800;Os11g0175700
TdBCAT-B	TFmatrixID_0421	-151	-	tGGTGCtgtg	TCP	Os01g0763200;Os03g0706500;Os03g0785800;Os05g0513100;LOC_Os07g04510;Os07g0152000;LOC_Os12g02090;Os12g0616400
TdBCAT-B	TF_motif_seq_0266	-150	+	GGTGC	TCP	Os03g0785800;Os04g0194600;Os12g0616400;Os01g0213800;Os08g0544800;Os11g0175700
TdBCAT-B	TF_motif_seq_0266	-150	-	GGTGC	TCP	Os03g0785800;Os04g0194600;Os12g0616400;Os01g0213800;Os08g0544800;Os11g0175700
TdBCAT-B	TF_motif_seq_0266	-133	+	CGTCC	TCP	Os03g0785800;Os04g0194600;Os12g0616400;Os01g0213800;Os08g0544800;Os11g0175700
TdBCAT-B	TF_motif_seq_0266	-133	-	CGTCC	TCP	Os03g0785800;Os04g0194600;Os12g0616400;Os01g0213800;Os08g0544800;Os11g0175700
TdBCAT-B	TF_motif_seq_0266	-126	+	GTACC	TCP	Os03g0785800;Os04g0194600;Os12g0616400;Os01g0213800;Os08g0544800;Os11g0175700
TdBCAT-B	TF_motif_seq_0266	-126	-	GTACC	TCP	Os03g0785800;Os04g0194600;Os12g0616400;Os01g0213800;Os08g0544800;Os11g0175700
TdBCAT-B	TF_motif_seq_0266	-117	+	GGCTC	TCP	Os03g0785800;Os04g0194600;Os12g0616400;Os01g0213800;Os08g0544800;Os11g0175700
TdBCAT-B	TF_motif_seq_0266	-117	-	GGCTC	TCP	Os03g0785800;Os04g0194600;Os12g0616400;Os01g0213800;Os08g0544800;Os11g0175700
TdBCAT-B	TF_motif_seq_0266	-116	+	GCTCC	TCP	Os03g0785800;Os04g0194600;Os12g0616400;Os01g0213800;Os08g0544800;Os11g0175700
TdBCAT-B	TF_motif_seq_0266	-116	-	GCTCC	TCP	Os03g0785800;Os04g0194600;Os12g0616400;Os01g0213800;Os08g0544800;Os11g0175700
TdBCAT-A	TF_motif_seq_0266	-106	+	GGCGC	TCP	Os03g0785800;Os04g0194600;Os12g0616400;Os01g0213800;Os08g0544800;Os11g0175700
TdBCAT-A	TF_motif_seq_0266	-106	-	GGCGC	TCP	Os03g0785800;Os04g0194600;Os12g0616400;Os01g0213800;Os08g0544800;Os11g0175700
TdBCAT-A	TF_motif_seq_0266	-87	+	GGGCT	TCP	Os03g0785800;Os04g0194600;Os12g0616400;Os01g0213800;Os08g0544800;Os11g0175700
TdBCAT-A	TF_motif_seq_0266	-87	-	GGGCT	TCP	Os03g0785800;Os04g0194600;Os12g0616400;Os01g0213800;Os08g0544800;Os11g0175700
TdBCAT-B	TF_motif_seq_0266	-81	+	TGGCC	TCP	Os03g0785800;Os04g0194600;Os12g0616400;Os01g0213800;Os08g0544800;Os11g0175700
TdBCAT-B	TF_motif_seq_0266	-81	-	TGGCC	TCP	Os03g0785800;Os04g0194600;Os12g0616400;Os01g0213800;Os08g0544800;Os11g0175700
TdBCAT-B	TF_motif_seq_0266	-80	+	GGCCA	TCP	Os03g0785800;Os04g0194600;Os12g0616400;Os01g0213800;Os08g0544800;Os11g0175700
TdBCAT-B	TF_motif_seq_0266	-80	-	GGCCA	TCP	Os03g0785800;Os04g0194600;Os12g0616400;Os01g0213800;Os08g0544800;Os11g0175700
TdBCAT-A	TF_motif_seq_0266	-68	+	GAACC	TCP	Os03g0785800;Os04g0194600;Os12g0616400;Os01g0213800;Os08g0544800;Os11g0175700
TdBCAT-A	TF_motif_seq_0266	-68	-	GAACC	TCP	Os03g0785800;Os04g0194600;Os12g0616400;Os01g0213800;Os08g0544800;Os11g0175700
TdBCAT-A	TF_motif_seq_0266	-48	+	GGGTC	TCP	Os03g0785800;Os04g0194600;Os12g0616400;Os01g0213800;Os08g0544800;Os11g0175700
TdBCAT-A	TF_motif_seq_0266	-48	-	GGGTC	TCP	Os03g0785800;Os04g0194600;Os12g0616400;Os01g0213800;Os08g0544800;Os11g0175700
TdBCAT-A	TF_motif_seq_0266	-47	+	GGTCG	TCP	Os03g0785800;Os04g0194600;Os12g0616400;Os01g0213800;Os08g0544800;Os11g0175700
TdBCAT-A	TF_motif_seq_0266	-47	-	GGTCG	TCP	Os03g0785800;Os04g0194600;Os12g0616400;Os01g0213800;Os08g0544800;Os11g0175700
TdBCAT-B	TF_motif_seq_0266	-25	+	GGGGC	TCP	Os03g0785800;Os04g0194600;Os12g0616400;Os01g0213800;Os08g0544800;Os11g0175700
TdBCAT-B	TF_motif_seq_0266	-25	-	GGGGC	TCP	Os03g0785800;Os04g0194600;Os12g0616400;Os01g0213800;Os08g0544800;Os11g0175700
TdBCAT-B	TF_motif_seq_0266	-24	+	GGGCG	TCP	Os03g0785800;Os04g0194600;Os12g0616400;Os01g0213800;Os08g0544800;Os11g0175700
TdBCAT-B	TF_motif_seq_0266	-24	-	GGGCG	TCP	Os03g0785800;Os04g0194600;Os12g0616400;Os01g0213800;Os08g0544800;Os11g0175700
TdBCAT-B	TF_motif_seq_0266	-23	+	GGCGC	TCP	Os03g0785800;Os04g0194600;Os12g0616400;Os01g0213800;Os08g0544800;Os11g0175700
TdBCAT-B	TF_motif_seq_0266	-23	-	GGCGC	TCP	Os03g0785800;Os04g0194600;Os12g0616400;Os01g0213800;Os08g0544800;Os11g0175700
TdBCAT-B	TF_motif_seq_0266	-22	+	GCGCC	TCP	Os03g0785800;Os04g0194600;Os12g0616400;Os01g0213800;Os08g0544800;Os11g0175700
TdBCAT-B	TF_motif_seq_0266	-22	-	GCGCC	TCP	Os03g0785800;Os04g0194600;Os12g0616400;Os01g0213800;Os08g0544800;Os11g0175700
TdBCAT-B	TF_motif_seq_0266	-21	+	CGCCC	TCP	Os03g0785800;Os04g0194600;Os12g0616400;Os01g0213800;Os08g0544800;Os11g0175700
TdBCAT-B	TF_motif_seq_0266	-21	-	CGCCC	TCP	Os03g0785800;Os04g0194600;Os12g0616400;Os01g0213800;Os08g0544800;Os11g0175700
TdBCAT-A	TF_motif_seq_0266	-16	+	GGGCG	TCP	Os03g0785800;Os04g0194600;Os12g0616400;Os01g0213800;Os08g0544800;Os11g0175700
TdBCAT-A	TF_motif_seq_0266	-16	-	GGGCG	TCP	Os03g0785800;Os04g0194600;Os12g0616400;Os01g0213800;Os08g0544800;Os11g0175700
TdBCAT-B	TF_motif_seq_0266	-16	+	GGGCG	TCP	Os03g0785800;Os04g0194600;Os12g0616400;Os01g0213800;Os08g0544800;Os11g0175700
TdBCAT-B	TF_motif_seq_0266	-16	-	GGGCG	TCP	Os03g0785800;Os04g0194600;Os12g0616400;Os01g0213800;Os08g0544800;Os11g0175700
TdBCAT-A	TFmatrixID_0452	-678	-	gatTTGACtg	WRKY	Os01g0182700;Os01g0185900;Os01g0186000;Os01g0246700;Os01g0289600;Os01g0584900;Os01g0586800;Os01g0624700;Os01g0626400;Os01g0656400;Os01g0665500;Os01g0714800;Os01g0730700;Os01g0734000;Os01g0750100;Os01g0972800;Os02g0181300;Os02g0265200;Os02g0462800;Os02g0698800;Os02g0770500;Os03g0335200;Os03g0741400;Os03g0758000;Os03g0798500;Os03g0855100;Os04g0287400;Os04g0545000;Os04g0597300;Os04g0605100;Os05g0137…
TdBCAT-A	TFmatrixID_0444	-677	-	atTTGACtgt	WRKY	Os01g0182700;Os01g0185900;Os01g0186000;Os01g0246700;Os01g0289600;Os01g0584900;Os01g0586800;Os01g0624700;Os01g0626400;Os01g0665500;Os01g0714800;Os01g0730700;Os01g0734000;Os01g0750100;Os01g0972800;Os02g0181300;Os02g0265200;Os02g0462800;Os02g0698800;Os02g0770500;Os03g0335200;Os03g0657400;Os03g0741400;Os03g0758000;Os03g0798500;Os03g0855100;Os04g0287400;Os04g0545000;Os04g0597300;Os04g0605100;Os05g0137…
TdBCAT-A	TFmatrixID_0451	-677	-	atTTGACtgt	WRKY	Os01g0826400;Os03g0444900;Os03g0758900;Os04g0471700;Os05g0343400;Os05g0474800;Os07g0583700;Os07g0596900;Os08g0276200;Os08g0499300;Os11g0685700;Os11g0686250;Os12g0507300
TdBCAT-A	TFmatrixID_0445	-676	-	tTTGACtg	WRKY	Os01g0182700;Os01g0185900;Os01g0186000;Os01g0246700;Os01g0289600;Os01g0584900;Os01g0586800;Os01g0624700;Os01g0626400;Os01g0665500;Os01g0714800;Os01g0730700;Os01g0734000;Os01g0750100;Os01g0820900;Os01g0972800;Os02g0181300;Os02g0265200;Os02g0462800;Os02g0698800;Os02g0770500;Os03g0741400;Os03g0758000;Os03g0798500;Os03g0855100;Os04g0287400;Os04g0545000;Os04g0597300;Os04g0605100;Os05g0137500;Os05g0183…
TdBCAT-A	TFmatrixID_0460	-676	-	tTTGACtg	WRKY	Os01g0182700;Os01g0185900;Os01g0186000;Os01g0246700;Os01g0289600;Os01g0584900;Os01g0586800;Os01g0624700;Os01g0626400;Os01g0656400;Os01g0665500;Os01g0714800;Os01g0730700;Os01g0734000;Os01g0750100;Os01g0972800;Os02g0181300;Os02g0265200;Os02g0462800;Os02g0698800;Os02g0770500;Os03g0335200;Os03g0741400;Os03g0758000;Os03g0798500;Os03g0855100;Os04g0287400;Os04g0545000;Os04g0597300;Os04g0605100;Os05g0137…
TdBCAT-B	TFmatrixID_0534	-507	+	ccacggGTCAA	WRKY	Os01g0826400;Os03g0444900;Os03g0758900;Os04g0471700;Os05g0343400;Os05g0474800;Os07g0583700;Os07g0596900;Os08g0276200;Os08g0499300;Os11g0685700;Os11g0686250;Os12g0507300
TdBCAT-B	TFmatrixID_0448	-504	+	cggGTCAAtag	WRKY	Os01g0182700;Os01g0185900;Os01g0186000;Os01g0246700;Os01g0289600;Os01g0584900;Os01g0586800;Os01g0624700;Os01g0626400;Os01g0665500;Os01g0714800;Os01g0730700;Os01g0734000;Os01g0750100;Os01g0820900;Os01g0972800;Os02g0181300;Os02g0265200;Os02g0462800;Os02g0698800;Os02g0770500;Os03g0741400;Os03g0758000;Os03g0798500;Os03g0855100;Os04g0287400;Os04g0545000;Os04g0597300;Os04g0605100;Os05g0137500;Os05g0183…
TdBCAT-B	TFmatrixID_0458	-504	+	cggGTCAAta	WRKY	Os01g0182700;Os01g0185900;Os01g0186000;Os01g0246700;Os01g0289600;Os01g0584900;Os01g0586800;Os01g0624700;Os01g0626400;Os01g0656400;Os01g0665500;Os01g0714800;Os01g0730700;Os01g0734000;Os01g0750100;Os01g0820900;Os01g0972800;Os02g0181300;Os02g0265200;Os02g0462800;Os02g0698800;Os02g0770500;Os03g0741400;Os03g0758000;Os03g0798500;Os03g0855100;Os04g0287400;Os04g0545000;Os04g0597300;Os04g0605100;Os05g0137…
TdBCAT-B	TFmatrixID_0463	-504	+	cggGTCAAta	WRKY	Os01g0182700;Os01g0185900;Os01g0186000;Os01g0246700;Os01g0289600;Os01g0584900;Os01g0586800;Os01g0624700;Os01g0626400;Os01g0656400;Os01g0665500;Os01g0714800;Os01g0730700;Os01g0734000;Os01g0750100;Os01g0972800;Os02g0181300;Os02g0265200;Os02g0462800;Os02g0698800;Os02g0770500;Os03g0335200;Os03g0657400;Os03g0741400;Os03g0758000;Os03g0798500;Os03g0855100;Os04g0287400;Os04g0545000;Os04g0597300;Os04g0605…
TdBCAT-B	TFmatrixID_0467	-504	+	cggGTCAAtagcc	WRKY	Os01g0656400
TdBCAT-B	TFmatrixID_0445	-503	+	ggGTCAAt	WRKY	Os01g0182700;Os01g0185900;Os01g0186000;Os01g0246700;Os01g0289600;Os01g0584900;Os01g0586800;Os01g0624700;Os01g0626400;Os01g0665500;Os01g0714800;Os01g0730700;Os01g0734000;Os01g0750100;Os01g0820900;Os01g0972800;Os02g0181300;Os02g0265200;Os02g0462800;Os02g0698800;Os02g0770500;Os03g0741400;Os03g0758000;Os03g0798500;Os03g0855100;Os04g0287400;Os04g0545000;Os04g0597300;Os04g0605100;Os05g0137500;Os05g0183…
TdBCAT-B	TFmatrixID_0449	-503	+	ggGTCAAt	WRKY	Os01g0826400;Os03g0444900;Os03g0758900;Os04g0471700;Os05g0343400;Os05g0474800;Os07g0583700;Os07g0596900;Os08g0276200;Os08g0499300;Os11g0686250;Os12g0507300
TdBCAT-B	TFmatrixID_0465	-503	+	ggGTCAAt	WRKY	Os01g0826400;Os03g0444900;Os03g0758900;Os04g0471700;Os05g0343400;Os05g0474800;Os07g0583700;Os07g0596900;Os08g0276200;Os08g0499300;Os11g0685700;Os11g0686250;Os12g0507300
TdBCAT-B	TFmatrixID_0468	-503	+	ggGTCAAta	WRKY	Os01g0182700;Os01g0185900;Os01g0186000;Os01g0246700;Os01g0289600;Os01g0584900;Os01g0586800;Os01g0624700;Os01g0626400;Os01g0656400;Os01g0665500;Os01g0730700;Os01g0734000;Os01g0750100;Os01g0820400;Os01g0820700;Os01g0820900;Os01g0821300;Os01g0972800;Os02g0265200;Os02g0462800;Os02g0698800;Os02g0770500;Os03g0335200;Os03g0657400;Os03g0741400;Os03g0758000;Os03g0798500;Os03g0855100;Os04g0287400;Os04g0545…
TdBCAT-A	TFmatrixID_0534	-455	+	ccacggGTCAA	WRKY	Os01g0826400;Os03g0444900;Os03g0758900;Os04g0471700;Os05g0343400;Os05g0474800;Os07g0583700;Os07g0596900;Os08g0276200;Os08g0499300;Os11g0685700;Os11g0686250;Os12g0507300
TdBCAT-A	TFmatrixID_0448	-452	+	cggGTCAAttg	WRKY	Os01g0182700;Os01g0185900;Os01g0186000;Os01g0246700;Os01g0289600;Os01g0584900;Os01g0586800;Os01g0624700;Os01g0626400;Os01g0665500;Os01g0714800;Os01g0730700;Os01g0734000;Os01g0750100;Os01g0820900;Os01g0972800;Os02g0181300;Os02g0265200;Os02g0462800;Os02g0698800;Os02g0770500;Os03g0741400;Os03g0758000;Os03g0798500;Os03g0855100;Os04g0287400;Os04g0545000;Os04g0597300;Os04g0605100;Os05g0137500;Os05g0183…
TdBCAT-A	TFmatrixID_0463	-452	+	cggGTCAAtt	WRKY	Os01g0182700;Os01g0185900;Os01g0186000;Os01g0246700;Os01g0289600;Os01g0584900;Os01g0586800;Os01g0624700;Os01g0626400;Os01g0656400;Os01g0665500;Os01g0714800;Os01g0730700;Os01g0734000;Os01g0750100;Os01g0972800;Os02g0181300;Os02g0265200;Os02g0462800;Os02g0698800;Os02g0770500;Os03g0335200;Os03g0657400;Os03g0741400;Os03g0758000;Os03g0798500;Os03g0855100;Os04g0287400;Os04g0545000;Os04g0597300;Os04g0605…
TdBCAT-A	TFmatrixID_0467	-452	+	cggGTCAAttgcc	WRKY	Os01g0656400
TdBCAT-A	TFmatrixID_0445	-451	+	ggGTCAAt	WRKY	Os01g0182700;Os01g0185900;Os01g0186000;Os01g0246700;Os01g0289600;Os01g0584900;Os01g0586800;Os01g0624700;Os01g0626400;Os01g0665500;Os01g0714800;Os01g0730700;Os01g0734000;Os01g0750100;Os01g0820900;Os01g0972800;Os02g0181300;Os02g0265200;Os02g0462800;Os02g0698800;Os02g0770500;Os03g0741400;Os03g0758000;Os03g0798500;Os03g0855100;Os04g0287400;Os04g0545000;Os04g0597300;Os04g0605100;Os05g0137500;Os05g0183…
TdBCAT-A	TFmatrixID_0449	-451	+	ggGTCAAt	WRKY	Os01g0826400;Os03g0444900;Os03g0758900;Os04g0471700;Os05g0343400;Os05g0474800;Os07g0583700;Os07g0596900;Os08g0276200;Os08g0499300;Os11g0686250;Os12g0507300
TdBCAT-A	TFmatrixID_0465	-451	+	ggGTCAAt	WRKY	Os01g0826400;Os03g0444900;Os03g0758900;Os04g0471700;Os05g0343400;Os05g0474800;Os07g0583700;Os07g0596900;Os08g0276200;Os08g0499300;Os11g0685700;Os11g0686250;Os12g0507300
TdBCAT-A	TFmatrixID_0468	-451	+	ggGTCAAtt	WRKY	Os01g0182700;Os01g0185900;Os01g0186000;Os01g0246700;Os01g0289600;Os01g0584900;Os01g0586800;Os01g0624700;Os01g0626400;Os01g0656400;Os01g0665500;Os01g0730700;Os01g0734000;Os01g0750100;Os01g0820400;Os01g0820700;Os01g0820900;Os01g0821300;Os01g0972800;Os02g0265200;Os02g0462800;Os02g0698800;Os02g0770500;Os03g0335200;Os03g0657400;Os03g0741400;Os03g0758000;Os03g0798500;Os03g0855100;Os04g0287400;Os04g0545…
